# 1 Investigating the genetic relationship between 2 depression symptoms and Alzheimer's Disease in 3 clinically diagnosed and proxy cases

4  
5 Lachlan Gilchrist<sup>a,b,c</sup>, Thomas P. Spargo<sup>a,d,e</sup>, Rebecca E. Green<sup>f</sup>, Jonathan R.I. Coleman<sup>b,e</sup>,  
6 David M. Howard<sup>b</sup>, Jackson G. Thorp<sup>g</sup>, Brett Adey<sup>b</sup>, Jodie Lord<sup>a</sup>, Helena L. Davies<sup>b</sup>, Jessica  
7 Mundy<sup>b</sup>, Molly R. Davies<sup>b,e</sup>, Christopher Hübel<sup>b,e</sup>, Shannon Bristow<sup>b,e</sup>, Sang Hyuck Lee<sup>b,e</sup>,  
8 Henry Rogers<sup>b,e</sup>, Charles Curtis<sup>b,e</sup>, Gursharan Kalsi<sup>b,e</sup>, Ryan Arathimos<sup>b</sup>, Anne Corbett<sup>h</sup>, Clive  
9 Ballard<sup>h</sup>, Helen Brooker<sup>h</sup>, Byron Creese<sup>h</sup>, Dag Aarsland<sup>i</sup>, Adam Hampshire<sup>j</sup>, Latha  
10 Velayudhani<sup>i</sup>, Thalia C. Eley<sup>b,e</sup>, Gerome Breen<sup>b,e</sup>, Alfredo Iacoangeli<sup>d,a,e</sup>, Sulev Koks<sup>c,k</sup>, Cathryn  
11 M. Lewis<sup>b,l</sup>, Petroula Proitsi<sup>a\*</sup> on behalf of the Alzheimer's Disease Neuroimaging Initiative,  
12 AddNeuroMed, and GERAD1 Consortium

13  
14 <sup>a</sup> Department of Basic and Clinical Neuroscience, King's College London, London, United Kingdom

15 <sup>b</sup> Social, Genetic and Developmental Psychiatry, King's College London, London, United Kingdom

16 <sup>c</sup> Perron Institute for Neurological and Translational Science, Perth, Australia

17 <sup>d</sup> Department of Biostatistics and Health Informatics, King's College London, London, United Kingdom

18 <sup>e</sup> NIHR Maudsley Biomedical Research Centre at South London and Maudsley NHS Foundation Trust  
19 and King's College London, King's College London, London, United Kingdom

20 <sup>f</sup> MRC Unit for Lifelong Health and Aging, University College London, London, United Kingdom

21 <sup>g</sup> Translational Neurogenomics Laboratory, QIMR Berghofer Medical Research Institute, Brisbane,  
22 Australia

23 <sup>h</sup> College of Medicine and Health, University of Exeter, Exeter, United Kingdom

24 <sup>i</sup> Old Age Psychiatry, King's College London, London, United Kingdom

25 <sup>j</sup> Faculty of Medicine, Department of Brain Sciences, Imperial College London, London, United Kingdom

26 <sup>k</sup> Centre for Molecular Medicine and Innovative Therapeutics, Murdoch University, Perth, Australia

27 <sup>l</sup> Department of Medical and Molecular Genetics, King's College London, London, United Kingdom

28

29

30 \* Corresponding author: Dr. Petroula Proitsi ([petroula.proitsi@kcl.ac.uk](mailto:petroula.proitsi@kcl.ac.uk))

31

32

33

34

35 **NOTE: This preprint reports new research that has not been certified by peer review and should not be used to guide clinical practice.**

## Abstract

36  
37  
38  
39  
40  
41  
42  
43  
44  
45  
46  
47  
48  
49  
50  
51  
52  
53  
54  
55  
56  
57  
58  
59  
60  
61  
62  
63  
64  
65  
66  
67

*Depression is a risk factor for the later development of Alzheimer's disease (AD), but evidence for their genetic relationship is mixed. Assessing depression symptom specific genetic associations may better clarify this relationship.*

*Using data from the UK Biobank, the GLAD Study and PROTECT, we performed the largest genome-wide meta-analyses (GWAS) of the nine depression symptom items, plus their sum score, on the Patient Health Questionnaire (PHQ-9) (GWAS equivalent N: 224,535–308,421). We then assessed global and local genetic correlations and statistical colocalisation between depression/depression symptoms and AD across six AD GWAS with varying proportions of clinical and proxy (family history) case ascertainment. We assessed bi-directional causal associations using Mendelian randomisation (MR) and tested the predictive utility of depression/depression symptom polygenic risk scores (PRS) for AD case/control status in three clinical AD cohorts.*

*Our GWAS meta-analyses identified 37 genomic risk loci across the ten depression symptom phenotypes. Of the 72 global genetic correlation tests conducted between depression/depression symptoms and AD, 20 were significant at  $p_{FDR} \leq 0.05$ . Only one of these was identified with AD GWAS containing clinical-only cases. Local genetic correlations were detected at 14 loci. Statistical colocalisation was not identified at these loci but was identified in the region of transmembrane protein 106B (TMEM106B) between multiple depression phenotypes and both clinical-only and clinical+proxy AD. MR and PRS analyses did not yield significant results after multiple testing correction.*

*Our findings do not demonstrate a causal role of depression/depression symptoms on AD and suggest that previous evidence of genetic overlap between depression and AD may be driven by the inclusion of family-history-based proxy cases/controls. However, the identification of colocalisation at TMEM106B warrants further investigation.*

## 68 1. INTRODUCTION

69 Epidemiological studies suggest that a diagnosis of depression is a risk factor for the  
70 later development of dementia<sup>1-6</sup>, of which Alzheimer's disease (AD) is the most  
71 common form, accounting for approximately 80% of the over 40 million global cases<sup>7</sup>.  
72 Establishing the underlying mechanisms by which depression confers increased risk  
73 for AD offers a pathway by which new interventions might be implemented and the  
74 global dementia burden reduced<sup>8</sup>.

75 As twin studies have demonstrated, both depression and AD are substantially  
76 heritable – approximately 40% and 80% respectively<sup>9,10</sup>. Further, large-scale genome-  
77 wide association studies (GWAS) have demonstrated high polygenicity, identifying  
78 over 70 genomic risk loci for AD and nearly 200 for depression<sup>11-17</sup>. It is therefore  
79 possible that their phenotypic association is in part due to shared genetic  
80 architecture. However, results from previous investigations into the genetic overlap  
81 between the two disorders have been mixed. For example, some findings indicate  
82 non-significant genetic overlap<sup>18,19</sup>, others a significant – if modest – genetic  
83 correlation of ~16-17% and a risk increasing causal effect of depression on AD<sup>20-22</sup>.

84 According to the Diagnostic and Statistical Manual of Mental Disorders (DSM-  
85 5), diagnosis of a major depressive episode requires the presence of at least five of  
86 a possible nine symptoms for  $\geq 2$  weeks, including one of the two cardinal symptoms  
87 – depressed mood or anhedonia<sup>23</sup>. Potentially hundreds of symptom combinations  
88 are possible to meet this diagnosis criteria<sup>24-26</sup>. As such, this heterogeneity poses  
89 challenges to researchers seeking to better understand differences in the genetic  
90 contribution to depression and its subtypes<sup>27,28</sup>. However, the decomposition of  
91 depression into individual symptoms has provided insight into unique patterns of  
92 genome-wide significant loci and cross-trait genetic associations, as demonstrated  
93 in a recent GWAS of depression symptoms on the Patient Health Questionnaire (PHQ-  
94 9) by Thorp et al.<sup>29</sup>.

95 A number of studies suggest that anhedonia may be a better predictor of  
96 dementia than depressed mood<sup>30-32</sup>. Further, several depression symptoms, such as  
97 appetite changes, psychomotor dysfunction, and sleep disruption are commonly  
98 observed in non-depressed dementia patients<sup>33-35</sup>. Taking this into account alongside  
99 the mixed nature of previous findings examining the genetic overlap between  
100 depression and AD, it is possible that leveraging depression symptom level genetic  
101 information may offer greater insight into the disorders shared genetic architecture.

102 However, any association between depression and AD must also consider the  
103 potential influence of differences in case/control ascertainment in AD GWAS. A review  
104 by Escott-Price et al.<sup>36</sup> notes that recent large-scale AD GWAS contain a relatively  
105 small proportion of clinically ascertained cases/controls, with a large percentage of

106 cases ascertained by proxy – that is, cases and controls are defined as individuals  
107 with and without a self-reported parental history of AD/dementia, respectively. The  
108 combination of clinical and proxy samples in AD GWAS meta-analyses has proved  
109 an effective way of boosting sample size and variant discovery<sup>15–17,37</sup>. However,  
110 evidence suggests that this has come at the expense of specificity in regard to  
111 genomic risk loci and an apparent stagnation in the percentage of variance explained  
112 by common variants<sup>36</sup>. Most importantly for cross-trait analysis, recent studies  
113 indicate that the direction of Mendelian Randomisation (MR) causal estimates for AD  
114 risk factors on AD can be in the opposite direction depending on whether the AD  
115 outcome GWAS contains clinical and proxy cases/controls or is more strictly clinically  
116 ascertained<sup>38–40</sup>.

117 To address these points, we perform the first and largest genome-wide meta-  
118 analyses of PHQ-9 depression symptom items using data from the Genetic Links to  
119 Anxiety and Depression (GLAD) Study<sup>41</sup>, the PROTECT Study<sup>42,43</sup> and two  
120 questionnaires from UK Biobank (UKB)<sup>44</sup>. We obtained summary statistics from  
121 previous large-scale GWAS for clinical<sup>11</sup> and broad<sup>12</sup> depression, and six AD GWAS.  
122 Specifically, three with clinical+proxy case/control ascertainment<sup>15–17</sup>, one with proxy-  
123 only<sup>37</sup>, and two with clinical-only<sup>14,45</sup>. We used these GWAS to assess the presence,  
124 strength and differences in genetic overlap between depression, depression  
125 symptoms and AD, with the additional aim of better understanding the influence of  
126 different AD case ascertainment strategies on associations.

127  
128  
129  
130  
131  
132  
133  
134  
135  
136  
137  
138  
139  
140  
141

## 142 2. METHODS

143 For an analysis flowchart, see Figure 1.

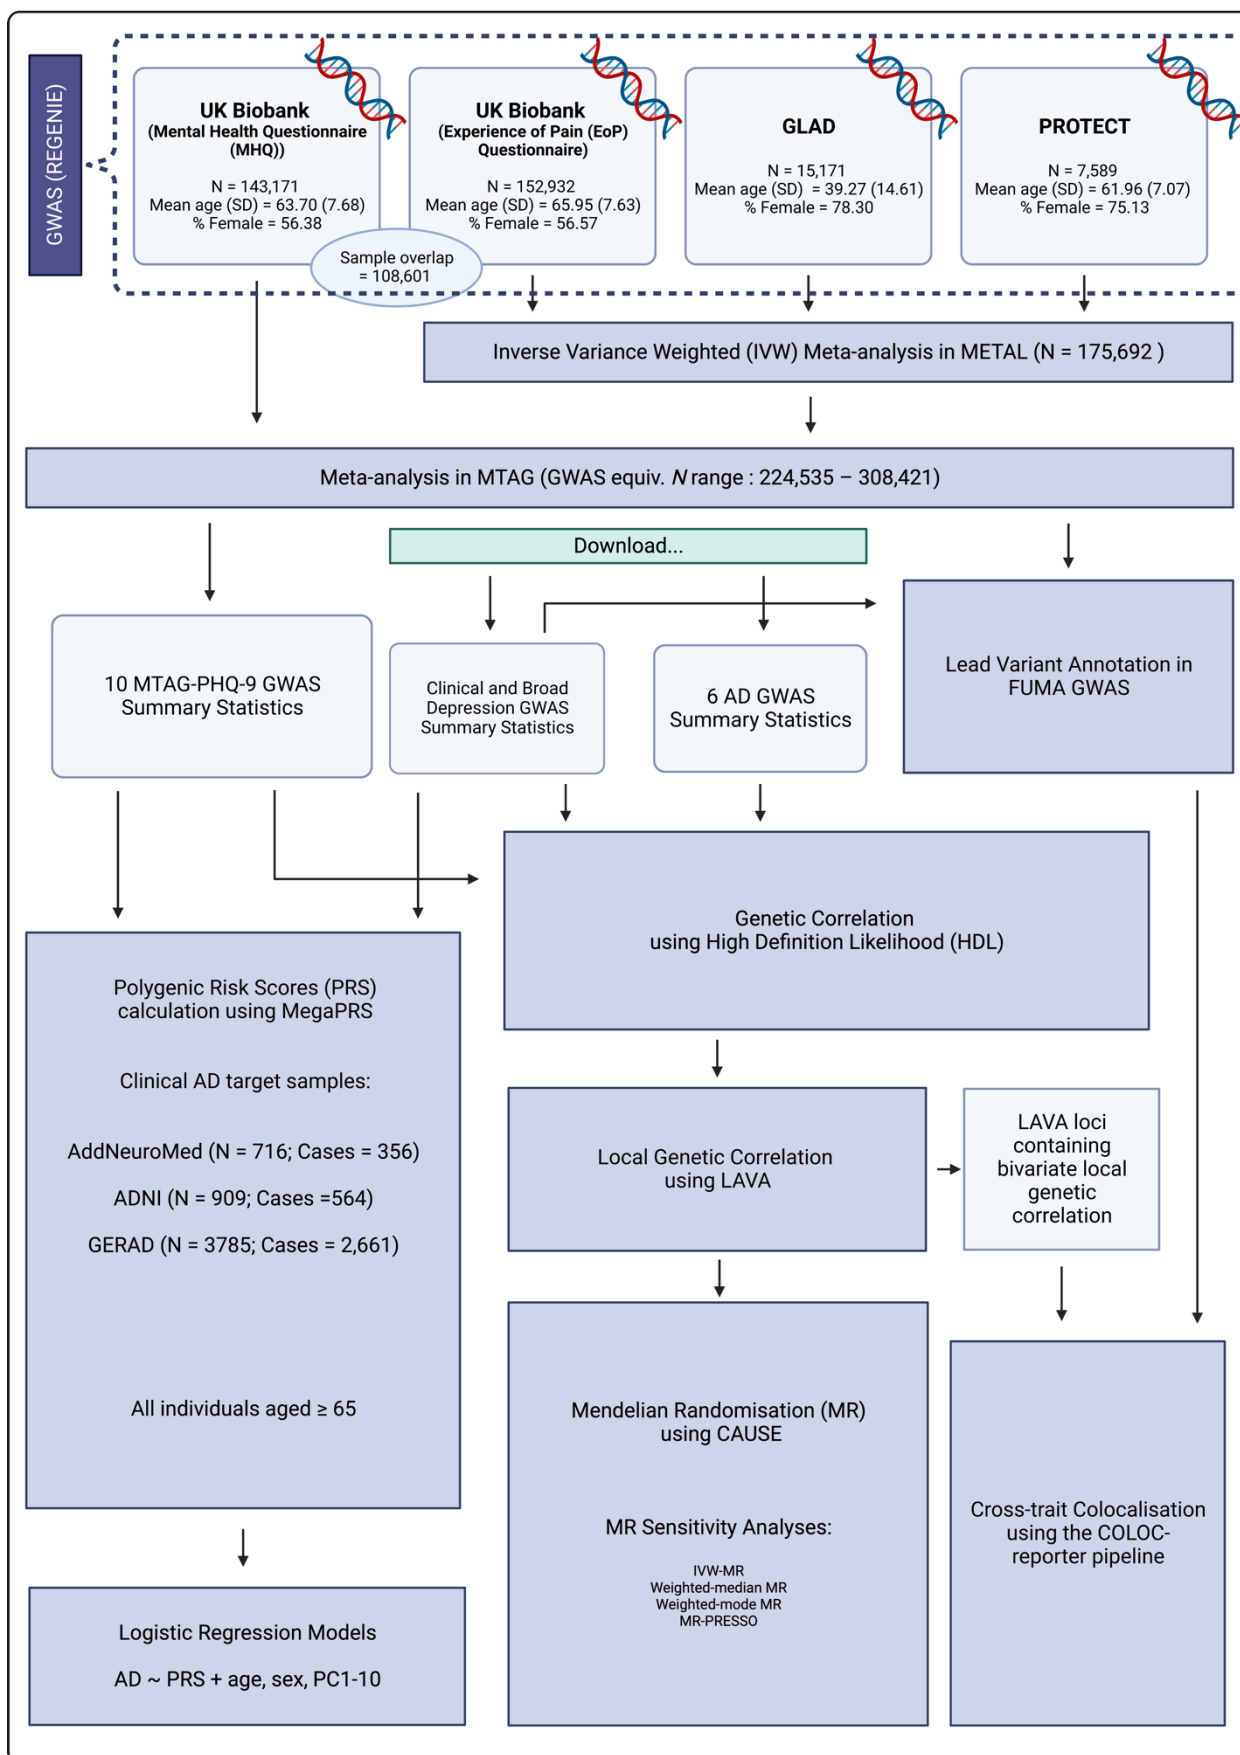

144  
145  
146  
147  
148  
149  
150  
151  
152  
153  
154  
155  
156  
157  
158  
159  
160  
161  
162  
163  
164  
165  
166  
167  
168  
169  
170  
171  
172  
173  
174  
175  
176  
177  
178  
179  
180  
181  
182

**Figure 1:** Analysis flowchart for the present study describing the analyses undertaken following genetic and phenotypic quality control (see: Methods) for each of the depression symptom items of the Patient Health Questionnaire (PHQ-9) in each of the four samples – UK Biobank (Mental Health Questionnaire and Experience of Pain Questionnaire), the Genetic Links in Anxiety and Depression (GLAD) Study and the PROTECT Study. GWAS = Genome-wide association analysis; AD = Alzheimer's Disease; MTAG = Multi-trait Analysis of GWAS; FUMA = Functional Mapping and Annotation; LAVA = Local Analysis of [co]Variant Association; ADNI = Alzheimer's Disease Neuroimaging Initiative; PC = genetic principal components

## 2.1 GWAS in the UK Biobank, GLAD and PROTECT

### 2.1.1 Patient Health Questionnaire-9 (PHQ-9) phenotypes

The PHQ-9 is a well-validated clinical screening questionnaire used to assess depression symptom severity on nine individual symptoms in the DSM-IV<sup>46,47</sup>. The severity of each symptom is measured by the self-reported persistence of that symptom over the preceding two weeks on a scale of 0 to 3. Scores of 3 indicate an individual experienced that symptom nearly every day, 2 indicates an individual experienced that symptom more than half the days, 1 indicates an individual experienced that symptom for several days and 0 indicates no experience of that symptom at all. The sum of an individual's scores over all nine items (sum-score) ranges from 0-27. For an overview of the PHQ-9 items and response distribution for each sample, see **Table 1**. Sum-score distributions can be seen in **Supplementary Table 1**.

183  
184  
185  
186

| Depression Symptom     | PHQ-9 Question:                                                                                                                                                          | UK Biobank Data Field (MHQ/EoP) | Cohort           | PHQ-9 Response         |                        |                             |                      |
|------------------------|--------------------------------------------------------------------------------------------------------------------------------------------------------------------------|---------------------------------|------------------|------------------------|------------------------|-----------------------------|----------------------|
|                        | How often in the last 2 weeks have you been bothered by any of the following problems?                                                                                   |                                 |                  | 0 (Not at all)         | 1 (Several days)       | 2 (more than half the days) | 3 (Nearly every day) |
| Anhedonia              | Little interest or pleasure in doing things                                                                                                                              | 20514/120104                    | UK Biobank (MHQ) | 117045 (81.75%)        | 21088 (14.73%)         | 2965 (2.07%)                | 2073 (1.45%)         |
|                        |                                                                                                                                                                          |                                 | UK Biobank (EoP) | 116330 (76.07%)        | 29743 (19.45%)         | 4115 (2.69%)                | 2744 (1.79%)         |
|                        |                                                                                                                                                                          |                                 | GLAD             | 4108 (27.08%)          | 6429 (42.31%)          | 2502 (16.49%)               | 2142 (14.12%)        |
|                        |                                                                                                                                                                          |                                 | PROTECT          | 6194 (81.62%)          | 1130 (14.89%)          | 127 (1.67%)                 | 138 (1.82%)          |
|                        |                                                                                                                                                                          |                                 | <b>Total</b>     | <b>243677 (76.42%)</b> | <b>58380 (18.31%)</b>  | <b>9709 (3.04%)</b>         | <b>7097 (2.23%)</b>  |
| Appetite Changes       | Poor appetite or overeating                                                                                                                                              | 20511/120108                    | UK Biobank (MHQ) | 117505 (82.07%)        | 18521 (12.94%)         | 3860 (2.70%)                | 3285 (2.29%)         |
|                        |                                                                                                                                                                          |                                 | UK Biobank (EoP) | 121071 (79.17%)        | 22432 (14.67%)         | 5404 (3.53%)                | 4025 (2.63%)         |
|                        |                                                                                                                                                                          |                                 | GLAD             | 4242 (27.96%)          | 4459 (29.39%)          | 3057 (20.15%)               | 3413 (22.50%)        |
|                        |                                                                                                                                                                          |                                 | PROTECT          | 6364 (83.86%)          | 971 (12.79%)           | 145 (1.91%)                 | 109 (1.44%)          |
|                        |                                                                                                                                                                          |                                 | <b>Total</b>     | <b>249182 (78.15%)</b> | <b>46383 (14.55%)</b>  | <b>12466 (3.90%)</b>        | <b>10832 (3.40%)</b> |
| Concentration Problems | Trouble concentrating on things                                                                                                                                          | 20508/120110                    | UK Biobank (MHQ) | 117951 (82.07%)        | 20386 (14.24%)         | 2713 (1.89%)                | 2121 (1.48%)         |
|                        |                                                                                                                                                                          |                                 | UK Biobank (EoP) | 123920 (81.03%)        | 23441 (15.33%)         | 3258 (2.13%)                | 2313 (1.51%)         |
|                        |                                                                                                                                                                          |                                 | GLAD             | 4665 (30.75%)          | 5200 (34.28%)          | 2891 (19.06%)               | 2415 (15.92%)        |
|                        |                                                                                                                                                                          |                                 | PROTECT          | 6374 (83.99%)          | 1022 (13.47%)          | 116 (1.53%)                 | 77 (1.01%)           |
|                        |                                                                                                                                                                          |                                 | <b>Total</b>     | <b>252910 (79.32%)</b> | <b>50049 (15.70%)</b>  | <b>8978 (2.82%)</b>         | <b>6926 (2.17%)</b>  |
| Depressed Mood         | Feeling down, depressed, or hopeless                                                                                                                                     | 20510/120105                    | UK Biobank (MHQ) | 112187 (78.36%)        | 26516 (18.52%)         | 2690 (1.88%)                | 1778 (1.24%)         |
|                        |                                                                                                                                                                          |                                 | UK Biobank (EoP) | 119004 (77.81%)        | 28914 (18.91%)         | 2998 (1.96%)                | 2016 (1.32%)         |
|                        |                                                                                                                                                                          |                                 | GLAD             | 3595 (23.70%)          | 6746 (44.47%)          | 2538 (16.73%)               | 2292 (15.11%)        |
|                        |                                                                                                                                                                          |                                 | PROTECT          | 6108 (80.48%)          | 1329 (17.51%)          | 92 (1.21%)                  | 60 (0.79%)           |
|                        |                                                                                                                                                                          |                                 | <b>Total</b>     | <b>240894 (75.55%)</b> | <b>63505 (19.92%)</b>  | <b>8318 (2.61%)</b>         | <b>6146 (1.93%)</b>  |
| Fatigue                | Feeling tired or having little energy                                                                                                                                    | 20519/120107                    | UK Biobank (MHQ) | 71903 (50.39%)         | 56170 (39.23%)         | 7595 (5.30%)                | 7503 (5.24%)         |
|                        |                                                                                                                                                                          |                                 | UK Biobank (EoP) | 74733 (48.87%)         | 61571 (40.26%)         | 8820 (5.77%)                | 7808 (5.11%)         |
|                        |                                                                                                                                                                          |                                 | GLAD             | 1335 (8.80%)           | 4971 (32.77%)          | 3530 (23.27%)               | 5335 (35.17%)        |
|                        |                                                                                                                                                                          |                                 | PROTECT          | 3715 (48.95%)          | 3164 (41.69%)          | 359 (4.73%)                 | 351 (4.63%)          |
|                        |                                                                                                                                                                          |                                 | <b>Total</b>     | <b>151686 (47.57%)</b> | <b>125876 (39.48%)</b> | <b>20304 (6.37%)</b>        | <b>20997 (6.58%)</b> |
| Feelings of Inadequacy | Feeling bad about yourself – or that you are a failure or have let yourself or your family down                                                                          | 20507/120109                    | UK Biobank (MHQ) | 116091 (81.09%)        | 21503 (15.02%)         | 2878 (2.01%)                | 2699 (1.89%)         |
|                        |                                                                                                                                                                          |                                 | UK Biobank (EoP) | 123702 (80.89%)        | 22756 (14.88%)         | 3399 (2.22%)                | 3075 (2.01%)         |
|                        |                                                                                                                                                                          |                                 | GLAD             | 3986 (26.27%)          | 5131 (33.82%)          | 2800 (18.46%)               | 3254 (21.45%)        |
|                        |                                                                                                                                                                          |                                 | PROTECT          | 6095 (80.31%)          | 1260 (16.60%)          | 128 (1.69%)                 | 106 (1.40%)          |
|                        |                                                                                                                                                                          |                                 | <b>Total</b>     | <b>249874 (78.36%)</b> | <b>50650 (15.88%)</b>  | <b>9205 (2.89%)</b>         | <b>9134 (2.86%)</b>  |
| Psychomotor Changes    | Moving or speaking so slowly that other people could have noticed, or the opposite – being so fidgety or restless that you have been moving around a lot more than usual | 20518/120111                    | UK Biobank (MHQ) | 135592 (94.71%)        | 5805 (4.05%)           | 1025 (0.72%)                | 749 (0.52%)          |
|                        |                                                                                                                                                                          |                                 | UK Biobank (EoP) | 141662 (92.63%)        | 8285 (5.42%)           | 1676 (1.10%)                | 1309 (0.86%)         |
|                        |                                                                                                                                                                          |                                 | GLAD             | 9932 (65.47%)          | 3254 (21.45%)          | 1215 (8.01%)                | 770 (5.08%)          |
|                        |                                                                                                                                                                          |                                 | PROTECT          | 7363 (97.02%)          | 182 (2.40%)            | 22 (0.29%)                  | 22 (0.29%)           |
|                        |                                                                                                                                                                          |                                 | <b>Total</b>     | <b>294549 (92.37%)</b> | <b>17526 (5.5%)</b>    | <b>3938 (1.24%)</b>         | <b>2850 (0.89%)</b>  |
| Sleep Problems         | Trouble falling asleep or staying asleep, or sleeping too much                                                                                                           | 20517/120106                    | UK Biobank (MHQ) | 73219 (51.14%)         | 48936 (34.18%)         | 10007 (6.99%)               | 11009 (7.69%)        |
|                        |                                                                                                                                                                          |                                 | UK Biobank (EoP) | 70799 (46.29%)         | 56955 (37.24%)         | 12245 (8.01%)               | 12933 (8.46%)        |
|                        |                                                                                                                                                                          |                                 | GLAD             | 2577 (16.99%)          | 5043 (33.24%)          | 3173 (20.91%)               | 4378 (28.86%)        |
|                        |                                                                                                                                                                          |                                 | PROTECT          | 3708 (48.86%)          | 2749 (36.22%)          | 570 (7.51%)                 | 562 (7.41%)          |
|                        |                                                                                                                                                                          |                                 | <b>Total</b>     | <b>150303 (47.14%)</b> | <b>113683 (35.65%)</b> | <b>25995 (8.15%)</b>        | <b>28882 (9.06%)</b> |
| Suicidal Thoughts      | Thoughts you would be better off dead or of hurting yourself in some way                                                                                                 | 20513/120112                    | UK Biobank (MHQ) | 137381 (95.96%)        | 4801 (3.35%)           | 566 (0.40%)                 | 423 (0.30%)          |
|                        |                                                                                                                                                                          |                                 | UK Biobank (EoP) | 146843 (96.02%)        | 4880 (3.19%)           | 686 (0.45%)                 | 523 (0.34%)          |
|                        |                                                                                                                                                                          |                                 | GLAD             | 9116 (60.09%)          | 3713 (24.47%)          | 1215 (8.01%)                | 1127 (7.43%)         |
|                        |                                                                                                                                                                          |                                 | PROTECT          | 7392 (97.40%)          | 172 (2.27%)            | 13 (0.17%)                  | 12 (0.16%)           |
|                        |                                                                                                                                                                          |                                 | <b>Total</b>     | <b>300732 (94.31%)</b> | <b>13566 (4.25%)</b>   | <b>2480 (0.78%)</b>         | <b>2085 (0.65%)</b>  |

187

188 **Table 1:** Patient Health Questionnaire (PHQ-9) derived depression symptom phenotypes, their  
189 corresponding question on the PHQ-9, and the distribution and percentage of responses for each of  
190 the four samples on which genome-wide association analysis was performed.

191



192

### 193 **2.1.2 Study population**

194 In each GWAS sample, individuals were only retained if they had reported European  
195 ancestry and had provided a valid response to all PHQ-9 items. Individuals were  
196 excluded if they had reported a previous professional diagnosis of schizophrenia,  
197 psychosis, mania, hypomania, bipolar, or manic depression (UKB Field ID: 20544) or  
198 a previous prescription of medication for a psychotic experience (UKB Field ID:  
199 20466).

### 200 **2.1.3 GWAS software**

201 All GWAS were conducted using REGENIE v3.1.3<sup>48</sup>. In step one of REGENIE, ridge  
202 regression is applied to a subset of quality controlled (QC'd) variants to fit, combine  
203 and decompose a set of leave-one-chromosome-out (LOCO) predictions. QC for step  
204 one was undertaken using PLINK v1.9<sup>49</sup>. In step two, imputed variants are tested for  
205 association with the phenotype. LOCO predictions from step one are included as  
206 covariates to control for proximal contamination. For all GWAS, genotyping batch,  
207 sex, age, and age-squared were included as covariates, as were the maximum  
208 available genetic principal components (PCs) for GLAD (10 PCs) and PROTECT (20  
209 PCs) to control for population stratification. For the UK Biobank analyses, 16 PCs were  
210 included as recommended by Privé et al.<sup>50</sup>. Assessment centre was also included as  
211 a covariate for UK Biobank analyses.

212 A total of 40 GWAS were conducted for the meta-analyses – one for each of  
213 the nine PHQ-9 depression symptom phenotypes as well as the sum-score across all  
214 nine items in each of the four samples. To maximise statistical power, PHQ-9  
215 phenotypes were treated as continuous (ranging 0-3 for individual items and 0-27 for  
216 the sum score) and analysed using linear regression. GWAS were restricted to the  
217 autosomes.

### 218 **2.1.4 GWAS: UK Biobank (UKB)**

219 UKB is a large-scale biomedical database and research resource consisting of  
220 ~500,000 individuals with data across a broad range of phenotypes, including mental  
221 health outcomes<sup>44</sup>. Individuals in UKB have been genotyped on the custom UK  
222 Biobank Axiom or UKBiLEVE arrays, with imputed data available for ~90 million  
223 variants imputed with IMPUTE2 using the Haplotype Reference Consortium (HRC)<sup>51</sup>  
224 and combined UK10K + 1000 Genomes Phase 3 reference panels<sup>52</sup>.

225 UKB participants have completed the PHQ-9 in two online surveys. In total,  
226 157,345 individuals provided responses as part of the Mental Health Questionnaire  
227 (UKB-MHQ) (Category: 136) between 2016 and 2017, and 167,199 individuals had  
228 provided responses as part of the Experience of Pain Questionnaire (UKB-EoP)  
229 (Category: 154) between 2019 and 2020.



230 After filtering for self-reported European ancestry, valid PHQ-9 responses, and  
231 previous diagnosis/prescription exclusions, 144,630 (UKB-MHQ) and 155,027 (UKB-  
232 EoP) individuals remained prior to genetic QC for REGENIE. In step one, single-  
233 nucleotide polymorphisms (SNPs) with a call rate > 98%, minor allele frequency  
234 (MAF) > 1%, and Hardy-Weinberg equilibrium test  $p > 1 \times 10^{-8}$  were retained, as were  
235 individuals with variant missingness < 2%, no unusual levels of heterozygosity, and  
236 not mismatched on sex. Individuals were retained if they were determined to be of  
237 European ancestry based on 4-means clustering on the first two principal  
238 components.

239 For the final GWAS analyses, 143,171 (mean age [SD] = 63.70 [7.68]; %female  
240 = 56.38%) and 152,932 (mean age [SD] = 65.95 [7.63]; %female = 56.57%)  
241 individuals proceeded from the MHQ and EoP questionnaires respectively. Of these,  
242 108,601 individuals had provided responses on both questionnaires. In step two, a  
243 total of 9,746,698 imputed variants were retained with MAF  $\geq 0.01$  and imputation  
244 INFO score  $\geq 0.7$ .

#### 245 **2.1.5 GWAS: Genetic Links to Anxiety and Depression (GLAD) Study**

246 The GLAD study has the specific goal of recruiting a large cohort of re-contactable  
247 individuals with anxiety or depression into the National Institute for Health and Care  
248 Research (NIHR) Mental Health BioResource with genetic, environmental and  
249 phenotypic data collected<sup>41</sup>. Genotyping for GLAD was conducted using the UK  
250 Biobank v2 Axiom array and imputed using the TopMed imputation pipeline<sup>53</sup>.

251 After filtering for self-reported European ancestry, valid PHQ-9 responses, and  
252 previous diagnosis/prescription exclusions, 15,472 individuals remained prior to  
253 genetic QC for REGENIE step one. Genotype data was provided by the study team  
254 and had been filtered to retain SNPs with a genotype call rate > 95%, MAF > 1%,  
255 Hardy-Weinberg equilibrium test  $p > 1 \times 10^{-10}$ , and individuals with genotype  
256 missingness < 5%. Individuals were additionally excluded if they had unusual levels  
257 of heterozygosity, mismatched on sex and of non-European ancestry based on 4-  
258 means clustering. A total of 15,171 individuals (mean age [SD] = 39.27 [14.61];  
259 %female = 78.30%) were retained for the final analysis. In step two, a total of  
260 13,979,187 imputed variants with MAF  $\geq 0.001$  and INFO  $\geq 0.7$  were analysed.

#### 261 **2.1.6 GWAS: PROTECT Study**

262 PROTECT is an online registry of ~25,000 UK-based individuals that aims to track  
263 cognitive health in older adults. Individuals were only considered eligible for inclusion  
264 in PROTECT if they were older than 50, had no previous dementia diagnosis and had  
265 internet access. Genetic data are available alongside phenotypic data for ~10,000 of  
266 the participants. These individuals were genotyped on the Illumina Infinium Global

267 Screening Array and imputed on the 1000 Genomes reference panel<sup>54</sup> using the  
268 Michigan imputation server and genotype phasing using Eagle.

269 After filtering for self-reported European ancestry, valid PHQ-9 responses, and  
270 previous diagnosis/prescription exclusions, 7,589 individuals remained for genetic  
271 QC for step one of REGENIE. Genetic data in PROTECT had been previously QC'd  
272 prior to imputation to only retain individuals and variants with a call rate > 98%, Hardy-  
273 Weinberg equilibrium test  $p > 0.00001$  and excluding unusual heterozygosity<sup>42</sup>.  
274 Variants used in step one were down-sampled from the imputed data using a snplist  
275 from the Illumina Infinium Global Screening Array provided by the PROTECT  
276 investigators. Variants were retained if they had MAF > 1%. After mismatched sex  
277 and 4-means clustering ancestry exclusions, a total of 7,589 individuals (mean age  
278 [SD] = 61.96 [7.07]; %female = 75.13%) proceeded to step two. In step two,  
279 9,388,534 imputed variants with MAF  $\geq 0.001$  and imputation INFO score  $\geq 0.7$  were  
280 analysed.

281

282

283

284

285

286

287

288

289

290

291

292

293

294

295

296

297

298

299

300

301 **2.2 GWAS summary statistics**

302 An overview of additional summary statistics obtained for this study can be seen in  
 303 Table 2.

| Phenotype<br>(Original GWAS)                                | Excluded<br>Samples    | Cases<br>(% Clinical) | Controls<br>(% Clinical) | Total   | SNP h <sup>2</sup><br>(SE) |
|-------------------------------------------------------------|------------------------|-----------------------|--------------------------|---------|----------------------------|
| <b>Depression GWAS</b>                                      |                        |                       |                          |         |                            |
| Broad Depression<br>(Howard et al. (2019))                  | 23andMe                | 170,756<br>(25.3%)    | 329,443<br>(29.0%)       | 500,199 | 0.0798<br>(0.003)          |
| Clinical Depression<br>(Wray et al. (2018))                 | UK Biobank;<br>23andMe | 45,591<br>(100%)      | 97674<br>(100%)          | 143,261 | 0.1012<br>(0.007)          |
| <b>Alzheimer's Disease GWAS</b>                             |                        |                       |                          |         |                            |
| Clinical + Proxy AD<br>(Bellenguez et al. (2022) (Stage 1)) | N/A                    | 85,934<br>(45.5%)     | 401,577<br>(14.0%)       | 487,511 | 0.0306<br>(0.003)          |
| Clinical + Proxy AD<br>(Wightman et al. (2021))             | 23andMe                | 86,531<br>(46.1%)     | 676,386<br>(26.1%)       | 762,917 | 0.0237<br>(0.004)          |
| Clinical + Proxy AD<br>(Jansen et al. (2019))               | N/A                    | 71,880<br>(33.5%)     | 383,378<br>(14.4%)       | 455,258 | 0.0234<br>(0.003)          |
| Proxy-only AD<br>(Marioni et al. (2018))                    | IGAP                   | 42,035<br>(0%)        | 272,243<br>(0%)          | 314,278 | 0.0165<br>(0.003)          |
| Clinical-only AD<br>(Wightman et al. (no UKB) (2021))       | UK Biobank;<br>23andMe | 39,918<br>(100%)      | 358,140<br>(29.1)        | 398,058 | 0.0431<br>(0.008)          |
| Clinical-only AD<br>(Kunkle et al. (2019) (Stage 1))        | N/A                    | 21,982<br>(100%)      | 41,944<br>(86.2%)        | 63,926  | 0.068<br>(0.011)           |

304

305 **Table 2:** An overview of previously conducted genome-wide association studies for depression and  
 306 Alzheimer's disease used in this study. Heritability estimates were calculated naively on the liability  
 307 scale from these standardised summary statistics using Linkage Disequilibrium Score Regression  
 308 (LDSC), taking a population prevalence of 15% for depression and 5% for Alzheimer's disease.

309

310 **2.2.1 Clinical and broad depression**

311 To examine potential differences in genetic overlap with AD between depression as  
 312 a disorder compared to individual depression symptoms, summary statistics for two  
 313 previously conducted GWAS of clinical and broad depression were obtained from  
 314 the Psychiatric Genomics Consortium (PGC) ([https://pgc.unc.edu/for-](https://pgc.unc.edu/for-researchers/download-results/)  
 315 [researchers/download-results/](https://pgc.unc.edu/for-researchers/download-results/)). For clinical depression, we used a subsample of the  
 316 Major Depressive Disorder (MDD) GWAS by Wray et al.<sup>11</sup> that excluded samples from  
 317 the UKB and 23andMe, and contained only individuals for whom case ascertainment  
 318 was defined through structured diagnostic interview or electronic health records. For  
 319 the broad definition depression GWAS, we used a subsample of the depression  
 320 GWAS by Howard et al.<sup>12</sup>, which also excluded samples from 23andMe. In addition

321 to clinical cases and controls used by Wray et al.<sup>11</sup>, this broad depression GWAS  
322 included individuals in the UKB for whom case-control ascertainment was based on  
323 self-reported responses to the questions “Have you ever seen a general practitioner  
324 for nerves, anxiety tension or depression?” and “Have you ever seen a psychiatrist  
325 for nerves anxiety, tension or depression?”.

### 326 **2.2.2 Alzheimer’s disease**

327 Summary statistics were obtained from six previously conducted AD GWAS: three  
328 with proxy+clinical, one with proxy-only and two with clinical-only case  
329 ascertainment. All three of the proxy+clinical AD GWAS – Bellenguez et al.<sup>17</sup>,  
330 Wightman et al.<sup>16</sup> and Jansen et al.<sup>15</sup> – and the proxy-only AD GWAS – Marioni et al.<sup>37</sup>  
331 – used data from the UKB for proxy AD samples.

332 There are some key differences in the way these AD GWAS define proxy cases  
333 and controls. Bellenguez et al.<sup>17</sup> define proxy cases/controls as a binary phenotype,  
334 whereby individuals reporting a parent with AD or dementia are considered cases  
335 and those reporting no parental history are considered controls. Wightman et al.<sup>16</sup>  
336 and Jansen et al.<sup>15</sup> instead define proxy cases/control as a continuous phenotype,  
337 summing the number of parents an individual has reported with dementia and down-  
338 weighting unaffected parents by their age (or age of death).

339 For the proxy-only Marioni et al.<sup>37</sup> GWAS, summary statistics were obtained  
340 from a meta-analysis of paternal and maternal AD. Here, proxy phenotyping was  
341 based on the self-report of either maternal or paternal AD, including the parent’s age  
342 at time of reporting/age of death as a covariate.

343 Summary statistics from a clinical-only subsample of the GWAS by Wightman  
344 et al. that excluded proxy cases/controls from the UKB<sup>45</sup> were obtained from the  
345 authors. Summary statistics for a final clinical-only AD GWAS were obtained from  
346 Stage 1 of the GWAS by Kunkle et al.<sup>14</sup>.

### 347 **2.3 Summary statistic standardisation**

348 Summary statistics from all 40 depression symptom GWAS, the two depression  
349 GWAS and the six AD GWAS, were standardised using the MungeSumstats<sup>55</sup> in R  
350 version 4.2.1. Using dbSNP 141 and the BSgenome.Hsapiens.1000genomes.hs37d5  
351 reference genome, missing rsIDs were corrected, duplicates and multi-allelic variants  
352 removed, effect alleles and the direction of their effects aligned to the reference  
353 genome, and variants filtered at INFO score  $\geq 0.7$  and MAF  $\geq 0.01$ . The GLAD Study  
354 and Bellenguez et al.<sup>17</sup> summary statistics were lifted over from GRCh38 to GRCh37.

### 355 **2.4 SNP heritability**

356 SNP heritability ( $h^2_{SNP}$ ) estimates were calculated for all GWAS used in this  
357 study with Linkage Disequilibrium Score Regression (LDSC)<sup>56,57</sup>. Briefly, LDSC  
358 calculates  $h^2_{SNP}$  by regressing the effect sizes from GWAS summary statistics on their

359 LD score as computed in a reference panel – in this case HapMap3 variants  
360 contained within the European sample of 1000 Genomes Phase 3. Liability scale  $h^2_{SNP}$   
361 was calculated naively from the standardised depression GWAS and AD GWAS using  
362 a 15% and 5% population prevalence respectively<sup>11,16</sup>. Heritability  $Z$ -scores were  
363 calculated for all phenotypes by dividing the  $h^2_{SNP}$  estimates by their standard error.

## 364 **2.5 GWAS meta-analysis of depression symptoms**

365 To leverage the maximum genetic information available controlling for the  
366 sample overlap between the UKB-MHQ and UKB-EoP samples, REGENIE output for  
367 each PHQ-9 phenotype from the UKB-EoP, GLAD Study and PROTECT were first  
368 subject to Inverse Variance Weighted (IVW) meta-analysis using METAL<sup>58</sup>. All  
369 available variants were included, for a total of 8,425,618 ( $N = 175,692$ ). Multi-trait  
370 Analysis of GWAS (MTAG)<sup>59</sup> v1.0.8 was then used to meta-analyse the METAL output  
371 with the UKB-MHQ sample. While MTAG is commonly used for the joint genetic  
372 analysis of multiple traits or multiple measurements of the same trait, by assuming the  
373 heritability of included phenotypes are equal (*--equal-h2*) and their genetic correlation  
374 is one (*--perfect-gencov*), MTAG performs an IVW meta-analysis of the same  
375 measures of the same trait, accounting for sample overlap using the cross-trait  
376 intercept from LDSC<sup>56,57</sup>. Heritability estimates for all samples, plus the METAL meta-  
377 analysis, are in **Supplementary Table 2**. Genetic correlations between the UKB-MHQ  
378 and METAL GWAS are in **Supplementary Table 3**. For greater detail on the IVW  
379 function of MTAG, see the online methods of the original MTAG paper<sup>59</sup>. A total of  
380 8,196,874 SNPs with MAF > 0.01 were present for MTAG analysis.

381 This MTAG function provides one set of summary statistics and two GWAS-  
382 equivalent sample sizes – one for each original sample included. A single, weighted  
383 GWAS-equivalent  $N$  was obtained for each PHQ-9-MTAG GWAS, using the following  
384 formula;

385

$$386 \quad N(\text{final}) = \frac{(N_1(\text{pre}) * N_1(\text{post})) + (N_2(\text{pre}) * N_2(\text{post}))}{N_1(\text{pre}) + N_2(\text{pre})}$$

387

388 where  $N_1$  and  $N_2$  represents the UKB-MHQ and METAL GWAS respectively,  
389  $pre$  is the mean sample size prior to inclusion in MTAG and  $post$  is the GWAS-  
390 equivalent sample estimated by MTAG following analysis.

## 391 **2.6 Genomic risk loci and gene annotation**

392 GWAS meta-analysis results were annotated using FUMA GWAS<sup>60</sup> v3.1.6a. Genome-  
393 wide significance was set at  $p \leq 5e-8$ . Lead variants at genomic risk loci were defined  
394 by clumping all variants correlated at  $r^2 > 0.1$  250kb either side. Clumping was  
395 performed using the European sample of the 1000 Genomes Phase 3 reference

396 panel. Lead variants were mapped to genes within 10kb using positional mapping  
397 and eQTLs from four brain (BrainSeq<sup>61</sup>, PsychENCODE<sup>62</sup>, CommonMind<sup>63</sup>, and  
398 BRAINEAC<sup>64</sup>) and five blood (BloodeQTL<sup>65</sup>, BIOS<sup>66</sup>, eQTLGen cis and trans<sup>67</sup>, Twins  
399 UK<sup>68</sup> and xQTLServer<sup>69</sup>) eQTL datasets, alongside all 54 tissue type eQTLs from GTEx  
400 v8 (<https://gtexportal.org/home/tissueSummaryPage>).

## 401 **2.7 Genetic correlations**

402 Genetic correlation can be understood as the genome-wide correlation of genetic  
403 effects between two phenotypes, and as such can be viewed as an estimate of  
404 pleiotropy<sup>70</sup>.

405 Genetic correlations were calculated between each depression phenotype  
406 and the six AD GWAS using High Definition Likelihood v1.4.1 (HDL)<sup>71</sup>. HDL extends  
407 the LDSC framework by leveraging LD information from across the whole LD  
408 reference panel through eigen decomposition, thus shrinking standard errors and  
409 improving precision. A pre-computed eigenvector/value LD reference panel  
410 calculated from 335,265 individuals of European ancestry in the UKB was obtained  
411 via the HDL GitHub (<https://github.com/zhenin/HDL/wiki/Reference-panels>). This  
412 reference panel was calculated using 1,029,876, imputed, autosomal HapMap3  
413 SNPs, with bi-allelic SNPs outside the MHC region, MAF > 5%, a call rate > 95% and  
414 INFO > 0.9 retained.

## 415 **2.8 Local genetic correlations**

416 Local genetic correlation assesses the correlation of genetic effects between two  
417 phenotypes in specific region of the genome. It provides a more refined examination  
418 of the genetic overlap between two phenotypes, allowing for the identification of key  
419 regions driving shared genetic architecture.

420 LAVA<sup>72</sup> was used to assess regions of local genetic correlation between each  
421 depression phenotype and the six AD GWAS across 2495 semi-independent, pre-  
422 defined LD-blocks of at least 2500 base pairs ([https://github.com/josefin-  
423 werme/LAVA](https://github.com/josefin-werme/LAVA)). Loci-specific heritability estimates were calculated for each  
424 phenotype for each block. If both a depression phenotype and an AD GWAS showed  
425 significant local heritability at a specific locus (Bonferroni corrected  $p$ -value  $\leq 2e-5$   
426 (0.05/2495)), bivariate local genetic correlation was tested. Bivariate results were  
427 considered significant at  $p_{FDR} \leq 0.05$  correcting for the total number of bivariate tests.  
428 Sample overlap was accounted for using an LDSC intercept matrix. Analysis was  
429 restricted to the 5,531,969 non-strand-ambiguous variants shared across all GWAS  
430 summary statistics and on the European ancestry 1000 Genomes Phase 3 reference  
431 panel.

432  
433



## 434 2.9 Colocalisation

435 Colocalisation using COLOC is a Bayesian statistical method to assess the  
436 probability of two phenotypes sharing a causal variant in a pre-defined genomic  
437 region.

438 Within the colocalisation framework, posterior probability is assessed for five  
439 hypotheses:

440

441  $H_0$ : There is no causal variant in the region for either phenotype

442  $H_1$ : There is a causal variant in the region for the first phenotype

443  $H_2$ : There is a causal variant in the region for the second phenotype

444  $H_3$ : Distinct causal variants for each trait in the region

445  $H_4$ : Both traits share a causal variant.

446

447 Colocalisation analysis was conducted using the COLOC-reporter pipeline<sup>73</sup>  
448 (<https://github.com/ThomasPSpargo/COLOC-reporter>). COLOC-reporter extracts  
449 variants in user-defined genomic regions and calculates the LD matrix for this region  
450 from a user-defined reference panel. It then harmonises the summary statistics to  
451 match the allele order of the reference panel, flipping effect directions accordingly.  
452 Observed versus expected Z-scores are assessed using the diagnostic tools  
453 provided in the susieR R package<sup>74</sup>. Z-score outliers are omitted. Following this QC,  
454 Sum of Single Effects (SuSiE) fine-mapping<sup>74</sup> is conducted to identify 95% credible  
455 sets in these regions for each phenotype. Identification of credible sets in both  
456 phenotype allows for the relaxation of the single causal variant assumption. All  
457 possible credible sets are then assessed pairwise for shared signal between  
458 phenotypes, improving resolution for colocalisation inference in regions containing  
459 multiple signals<sup>75</sup>. Should no 95% credible set be identified or only identified for one  
460 phenotype, colocalisation under the single causal variant assumption is performed  
461 using the *coloc.ab*<sup>76</sup>. A posterior probability  $\geq 80\%$  for  $H_4$  was considered evidence  
462 of colocalisation between two phenotypes ( $PP.H_4 \geq 0.8$ ). The SuSiE model assumed  
463 at most 10 causal variants ( $L = 10$ ) per credible set. We used default priors.

464 Trait pairs with LAVA correlations significant at  $p_{FDR} \leq 0.05$  were passed to  
465 COLOC-reporter. Where the same depression phenotype showed nominally  
466 significant local genetic correlation at the same locus but with different AD GWAS,  
467 these phenotype pairs were included as a sensitivity analysis. Regions  $\pm 250\text{kb}$  ( $r^2$   
468  $\geq 0.1$ ) from lead variants at genome-wide significant loci from the MTAG-PHQ-9,  
469 broad and clinical depression GWAS were also examined for evidence of  
470 colocalisation with the 6 AD GWAS.

471

## 472 **2.10 Mendelian randomisation (MR)**

473 MR is a statistical method that uses genetic variants associated with an exposure as  
474 instrumental variables to assess the causal effect of that exposure on an outcome of  
475 interest<sup>77</sup>. Two Sample MR framework estimates the causal relationships between an  
476 exposure and outcome using GWAS summary statistics. Valid MR instruments are  
477 defined by three key assumptions: (1) relevance – IVs are strongly associated with  
478 the exposure of interest; (2) independence – there are no confounders in the  
479 association between IVs and the outcome of interest; and (3) exclusion restriction –  
480 instruments are not associated to the outcome other than via the exposure, for  
481 example through horizontal pleiotropy<sup>77</sup>.

482 Sample overlap is a known source of bias in Two Sample MR<sup>78</sup>. Given the  
483 likelihood of sample overlap between the depression phenotypes and the AD GWAS  
484 containing proxy cases/controls due to participants from the UKB, MR analysis was  
485 primarily conducted using Causal Analysis Using Summary Effect estimates  
486 (CAUSE)<sup>79</sup> v1.2.0. CAUSE is a Bayesian MR method robust to sample overlap,  
487 correlated and uncorrelated pleiotropy, also avoiding exclusion restriction  
488 assumption violations<sup>80</sup>.

489 In CAUSE, the presence of a significant causal effect,  $\gamma$ , is derived by  
490 comparing the expected log pointwise posterior density (ELPD) of a sharing model  
491 with  $\gamma$  fixed to zero to a causal model where  $\gamma$  is a free parameter for a one-tailed p-  
492 value test. The posterior median of  $\gamma$  describes the causal effect estimate and is  
493 reported alongside its 95% credible intervals. CAUSE uses a larger set of instruments  
494 that traditional MR methods. As such, clumping was performed with the default  
495 setting at  $r^2 \geq 0.01$  and a  $p$ -value  $\leq 0.001$  within a 10,000kb window.

496 Causal estimates were also calculated using the traditional IVW method. IVW  
497 estimates are biased by the presence of horizontal pleiotropy<sup>81</sup>. Sensitivity analyses  
498 were therefore conducted using MR-Egger, weighted-median and weighted-mode  
499 MR. These methods allow for varying degrees of pleiotropy while providing unbiased  
500 causal estimates<sup>82-84</sup>. MR-PRESSO<sup>85</sup> was also implemented. MR-PRESSO identifies  
501 and excludes outlying instruments based on their contribution to heterogeneity and  
502 provides a corrected causal estimate.

503 Pleiotropy was assessed using the MR-Egger intercept test<sup>86</sup> (significant  
504 pleiotropy:  $p \leq 0.05$ ). Heterogeneity tests were also conducted for IVW and MR-Egger  
505 estimates using their respective Cochran's Q test<sup>87</sup> (significant heterogeneity:  $p$ -value  
506  $\leq 0.05$ ). Instrument strength was calculated via the minimum and mean F-statistic  
507 (recommended F-statistic  $\geq 10$ )<sup>88</sup> ( $\beta^2/SE^2$ ).  $I^2$  was calculated to ensure measurement  
508 error was sufficiently low so as to ensure validity of results from MR-Egger  
509 (recommended  $I^2 \geq 0.90$ )<sup>89</sup>.

510 For IVW-MR, MR-Egger, weighted-median and weighted-mode MR,  
511 instruments clumped at a  $r^2 \geq 0.001$  and a  $p$ -value  $\leq 5e-8$  within 10,000kb. Where no  
512 instruments were available at  $p \leq 5e-8$  or where  $< 5$  instruments were available, a  $p$   
513  $\leq 5e-6$  threshold was used.

514 For all analyses, instruments were clumped using data from individuals of  
515 European ancestry in 1000 Genomes Phase 3. IVW, MR-Egger, weighted-median and  
516 weighted-mode analyses were conducted using the TwoSampleMR package v0.5.6.

517 The *APOE* gene is known to be associated with non-AD phenotypes such as  
518 cardiovascular disease<sup>90</sup> and type 2 diabetes (T2D)<sup>91</sup>. Both have been linked to  
519 depression in previous MR analyses<sup>92,93</sup>. As such, the inclusion of *APOE* would violate  
520 MR's independence assumption. All MR analyses were therefore conducted  
521 excluding variants in the APOE region (chr19:45,020,859–45,844,508 (GRCh37)) as  
522 per Lord et al.<sup>94</sup>.

## 523 **2.11 Polygenic risk scores (PRS)**

524 Polygenic risk scores (PRS) describe the sum of an individual's risk alleles, weighted  
525 by their effect size<sup>95</sup>. The ten PHQ-9-MTAG, clinical depression and broad definition  
526 depression GWAS were processed for PRS using the BayesR-SS function contained  
527 within MegaPRS and implemented in LDAK v5.2.1.<sup>96</sup> BayesR-SS assumes the BLD-  
528 LDAK heritability model, which incorporates 65 genome annotations pertaining to  
529 genomic features such as whether the variants are in coding regions or highly  
530 conserved<sup>96</sup>. Annotation files were obtained from the LDAK website  
531 (<http://dougsspeed.com/bldldak/>). PRS calculation was restricted to the 1,217,311  
532 HapMap3 SNPs, with strand ambiguous SNPs excluded.

533 PRS predictive utility for AD case/control status was assessed using logistic  
534 regression in three clinically ascertained AD cohorts: AddNeuroMed and Dementia  
535 Case Register Studies (ANM)<sup>97</sup> ( $N_{cases} = 564$ ;  $N_{controls} = 345$ ), the Alzheimer's Disease  
536 Neuroimaging Initiative (ADNI) (<https://adni.loni.usc.edu>) ( $N_{cases} = 356$ ;  $N_{controls} = 360$ ),  
537 and the Genetic and Environmental Risk in Alzheimer's Disease (GERAD1)  
538 Consortium

539 (<https://portal.dementiasplatform.uk/CohortDirectory/Item?fingerPrintID=GERAD>)  
540 ( $N_{cases} = 2,661$ ;  $N_{controls} = 1,124$ ) (Supplementary Table 4). All analyses controlled for  
541 age, sex, and 10 PCs, and were restricted to individuals aged  $\geq 65$  to provide clean  
542 controls. As a sensitivity analysis, PRS were also calculated in these cohorts  
543 excluding the *APOE* region. Genetic QC and imputation steps for these cohorts can  
544 be viewed in detail in the study by Lord et al.<sup>98</sup>.

545  
546  
547

### 548 3. RESULTS

#### 549 3.1 PHQ-9 genome-wide meta-analyses

550 The MTAG meta-analyses identified a total of 40 genomic risk loci between the ten  
551 PHQ-9 phenotypes (GWAS equivalent  $N$  range: 224,535 – 308,421). Only one  
552 depression symptom – suicidal thoughts – identified no genome-wide significant  
553 variants. Three lead SNPs were shared with more than one PHQ-9 phenotype, leaving  
554 a total of 37 unique genomic risk loci (**Table 3**). The significance of each of the lead  
555 variants in each of the samples contributing to the meta-analysis can be seen in  
556 **Supplementary Table 5**. eQTL mapping in FUMA mapped lead variants at genomic  
557 risk loci to 76 genes (**Supplementary Table 6**).  $h^2_{SNP}$  for the MTAG-PHQ-9 GWAS  
558 ranged from 1.12% for suicidal thoughts to 6.78% for the PHQ-9 sum-score.  $h^2_{SNP}$   $Z$ -  
559 scores were all  $> 4$  (range: 6.59 – 18.50) (**Supplementary Table 7**), indicating  
560 sufficient heritability to obtain reliable genetic correlation estimates in downstream  
561 analyses<sup>57</sup>. Genomic inflation factors ( $\lambda_{GC}$ ) ranged from 1.0638 to 1.2156, with LDSC  
562 intercepts ranging from 0.9997 to 1.0007, indicating inflation was due to polygenic  
563 signal as opposed to confounding due to population stratification<sup>56,99</sup>. Manhattan and  
564 QQ plots can be viewed in **Figure 2**.

565  
566  
567  
568  
569  
570  
571  
572

| Genomic Locus | CHR | Position  | Lead Variant | Phenotype              | p-value  | BETA   | SE    | Effect Allele | MAF   | Nearest Gene     | eQTL Genes                                                                                                   |
|---------------|-----|-----------|--------------|------------------------|----------|--------|-------|---------------|-------|------------------|--------------------------------------------------------------------------------------------------------------|
| 1             | 1   | 21059837  | rs61778528   | Anhedonia              | 1.27E-08 | -0.011 | 0.002 | T             | 0.384 | RP5-930J4.2      | KIF17, SH2D5, ECE1, HP1BP3, EIF4G3                                                                           |
| 2             | 1   | 51661974  | rs36116328   | Concentration Problems | 2.94E-08 | 0.011  | 0.002 | C             | 0.052 | RP11-296A18.3    | EPS15, TTC39A, RNF11, CDKN2C,                                                                                |
| 3             | 1   | 201787833 | rs2494112    | Sleep Problems         | 4.46E-08 | 0.011  | 0.002 | A             | 0.486 | NAV1:IPO9-AS1    | NAV1, LMOD1, SHISA4, RNPEP,                                                                                  |
| 4             | 1   | 201859213 | rs61824384   | Fatigue                | 3.81E-09 | -0.012 | 0.002 | G             | 0.385 | SHISA4           | NAV1, LMOD1, SHISA4, IPO9, TIMM17A, RNPEP.                                                                   |
|               |     |           |              | PHQ-9 Sum Score        | 4.48E-11 | -0.014 | 0.002 | G             | 0.385 | SHISA4           |                                                                                                              |
| 5             | 1   | 201919674 | rs2790898    | Feelings of Inadequacy | 2.54E-08 | 0.011  | 0.002 | T             | 0.425 | LMOD1            | LMOD1, RNPEP, IPO9, SHISA4, TIMM17A                                                                          |
| 6             | 2   | 66750564  | rs113851554  | Sleep Problems         | 1.42E-14 | 0.016  | 0.002 | T             | 0.053 | MEIS1            | MEIS1                                                                                                        |
| 7             | 3   | 48812594  | rs116113836  | Depressed Mood         | 2.74E-08 | 0.011  | 0.002 | A             | 0.033 | PRKAR2A          | AMT, ZNF589, ATRIP, NME6, WDR6, P4HTM, QRICH1, NICN1, RNF123, GMPPB, LAMB2, USP4, MST1, TREX1, TMA7, KLHDC8B |
| 8             | 3   | 117535095 | rs76917635   | Feelings of Inadequacy | 1.65E-08 | -0.012 | 0.002 | G             | 0.194 | SAMP:RP11-384F7. | -                                                                                                            |
| 9             | 3   | 117822025 | rs7619072    | Sleep Problems         | 7.14E-11 | 0.013  | 0.002 | C             | 0.229 | RP11-384F7.1     | LSAMP                                                                                                        |
| 10            | 4   | 106217349 | rs2647239    | Sleep Problems         | 1.17E-08 | -0.012 | 0.002 | G             | 0.420 | RN7SL89P         | PPA2, TET2                                                                                                   |
| 11            | 5   | 62392481  | rs181208594  | Psychomotor Changes    | 2.72E-08 | 0.011  | 0.002 | G             | 0.017 | RP11-586E1.1     | -                                                                                                            |
| 12            | 6   | 28548674  | rs146918648  | Appetite Changes       | 1.49E-08 | 0.012  | 0.002 | A             | 0.027 | SCAND3           | ZSCAN9, PGBD1, ZKSCAN3, ZNF165, TRIM27, ZSCAN23, SCAND3, ZSCAN12, C6orf100"                                  |
| 13            | 6   | 32555944  | rs35773267   | Fatigue                | 1.63E-09 | 0.013  | 0.002 | T             | 0.372 | HLA-DRB1         | -                                                                                                            |
| 14            | 7   | 12250378  | rs3807866    | Depressed Mood         | 4.38E-08 | 0.011  | 0.002 | A             | 0.398 | TMEM106B         | TMEM106B                                                                                                     |
| 15            | 7   | 12277442  | rs13234970   | Appetite Changes       | 1.56E-08 | 0.012  | 0.002 | C             | 0.400 | TMEM106B         | -                                                                                                            |
| 16            | 7   | 12285140  | rs12699338   | PHQ-9 Sum Score        | 8.47E-09 | 0.012  | 0.002 | T             | 0.405 | TMEM106B         | TMEM106B                                                                                                     |
| 17            | 7   | 82394712  | rs763296     | Fatigue                | 1.03E-10 | 0.013  | 0.002 | G             | 0.495 | PCLO             | -                                                                                                            |
| 18            | 7   | 121955328 | rs3958046    | Appetite Changes       | 3.58E-09 | 0.012  | 0.002 | T             | 0.389 | CADPS2           | -                                                                                                            |
| 19            | 8   | 19551329  | rs13253689   | Fatigue                | 4.55E-08 | -0.011 | 0.002 | C             | 0.243 | CSGALNACT1       | INTS10, CSGALNACT1, LPL                                                                                      |
| 20            | 8   | 37211598  | rs150773120  | Appetite Changes       | 1.19E-08 | 0.012  | 0.002 | A             | 0.012 | RP11-527N22.1    | -                                                                                                            |
| 21            | 8   | 73452488  | rs7824350    | Fatigue                | 8.58E-09 | -0.012 | 0.002 | G             | 0.410 | KCNB2            | -                                                                                                            |
| 22            | 10  | 11149133  | rs61830447   | Inadequacy             | 3.80E-08 | 0.011  | 0.002 | A             | 0.243 | CELF2            | CELF2                                                                                                        |
| 23            | 12  | 57323523  | rs840161     | PHQ-9 Sum Score        | 3.71E-09 | 0.012  | 0.002 | G             | 0.339 | SDR9C7           | METTL21B, TMEM194A, STAT6, NAB2, RBMS2, LRP1                                                                 |
| 24            | 12  | 57331741  | rs725957     | Fatigue                | 4.68E-08 | 0.011  | 0.002 | A             | 0.394 | SDR9C7           | METTL21B, TMEM194A, STAT6, NAB2, RBMS2, LRP1, RDH16, DTX3, SDR9C7                                            |
| 25            | 12  | 109874794 | rs10850137   | Fatigue                | 1.11E-09 | 0.013  | 0.002 | G             | 0.336 | MYO1H            | UBE3B, MMAB, ACACB, KCTD10, MVK, MYO1H, FOXN4, UNG                                                           |
| 26            | 13  | 66718798  | rs185907577  | Depressed Mood         | 2.81E-08 | 0.011  | 0.002 | G             | 0.103 | MIR4704          | -                                                                                                            |
|               |     |           |              | Fatigue                | 4.11E-09 | 0.012  | 0.002 | G             | 0.103 | MIR4704          |                                                                                                              |
|               |     |           |              | PHQ-9 Sum Score        | 9.73E-10 | 0.013  | 0.002 | G             | 0.103 | MIR4704          |                                                                                                              |
| 27            | 16  | 53801549  | rs9923147    | Appetite Changes       | 1.74E-11 | 0.014  | 0.002 | T             | 0.443 | FTO              | FTO                                                                                                          |
| 28            | 17  | 56044110  | rs11654634   | PHQ-9 Sum Score        | 8.48E-10 | 0.013  | 0.002 | C             | 0.067 | VEZF1            | CUEDC1, TEX14                                                                                                |
| 29            | 17  | 56124979  | rs11657437   | Anhedonia              | 2.62E-08 | 0.011  | 0.002 | A             | 0.105 | RP11-159D12.10   | VEZF1                                                                                                        |
| 30            | 17  | 65989971  | rs113985803  | Appetite Changes       | 4.18E-08 | -0.011 | 0.002 | A             | 0.226 | RP11-855A2.5     | BPTF, KPNA2, PSMD12                                                                                          |
| 31            | 17  | 66045831  | rs74354868   | Fatigue                | 2.78E-08 | 0.011  | 0.002 | A             | 0.229 | KPNA2            | BPTF, KPNA2, C17orf58, ARSG, PSMD12                                                                          |
| 32            | 18  | 35127427  | rs1557341    | PHQ-9 Sum Score        | 1.94E-08 | -0.012 | 0.002 | C             | 0.341 | CELF4            | -                                                                                                            |
| 33            | 18  | 50754093  | rs62100775   | Fatigue                | 1.92E-08 | 0.012  | 0.002 | G             | 0.419 | DCC              | DCC                                                                                                          |
|               |     |           |              | PHQ-9 Sum Score        | 1.44E-08 | 0.012  | 0.002 | G             | 0.419 | DCC              |                                                                                                              |
| 34            | 18  | 50829023  | rs11877505   | Anhedonia              | 3.40E-09 | 0.012  | 0.002 | G             | 0.388 | DCC              | DCC                                                                                                          |
| 35            | 18  | 53415377  | rs4800995    | Fatigue                | 4.60E-10 | 0.013  | 0.002 | A             | 0.214 | RP11-397A16.1    | -                                                                                                            |
| 36            | 18  | 71620555  | rs75020204   | Sleep Problems         | 4.34E-08 | -0.011 | 0.002 | C             | 0.071 | RP11-25L3.3      | -                                                                                                            |
| 37            | 19  | 7871720   | rs3223231    | Anhedonia              | 4.40E-09 | -0.012 | 0.002 | A             | 0.462 | EXOSC3P2         | -                                                                                                            |

573

574

575 **Table 3:** Genomic risk loci from the 10 MTAG-PHQ-9 genome-wide association meta-analyses. Nearest gene is  
576 based on positional mapping and ANNOVAR annotation. Expression quantitative trait loci (eQTL) mapping was  
577 limited to  $p_{FDR} \leq 0.05$  in the selected eQTL datasets (see: Methods). Specific tissues with significant  $p_{FDR}$  can be  
578 seen in Supplementary Table 2.



57

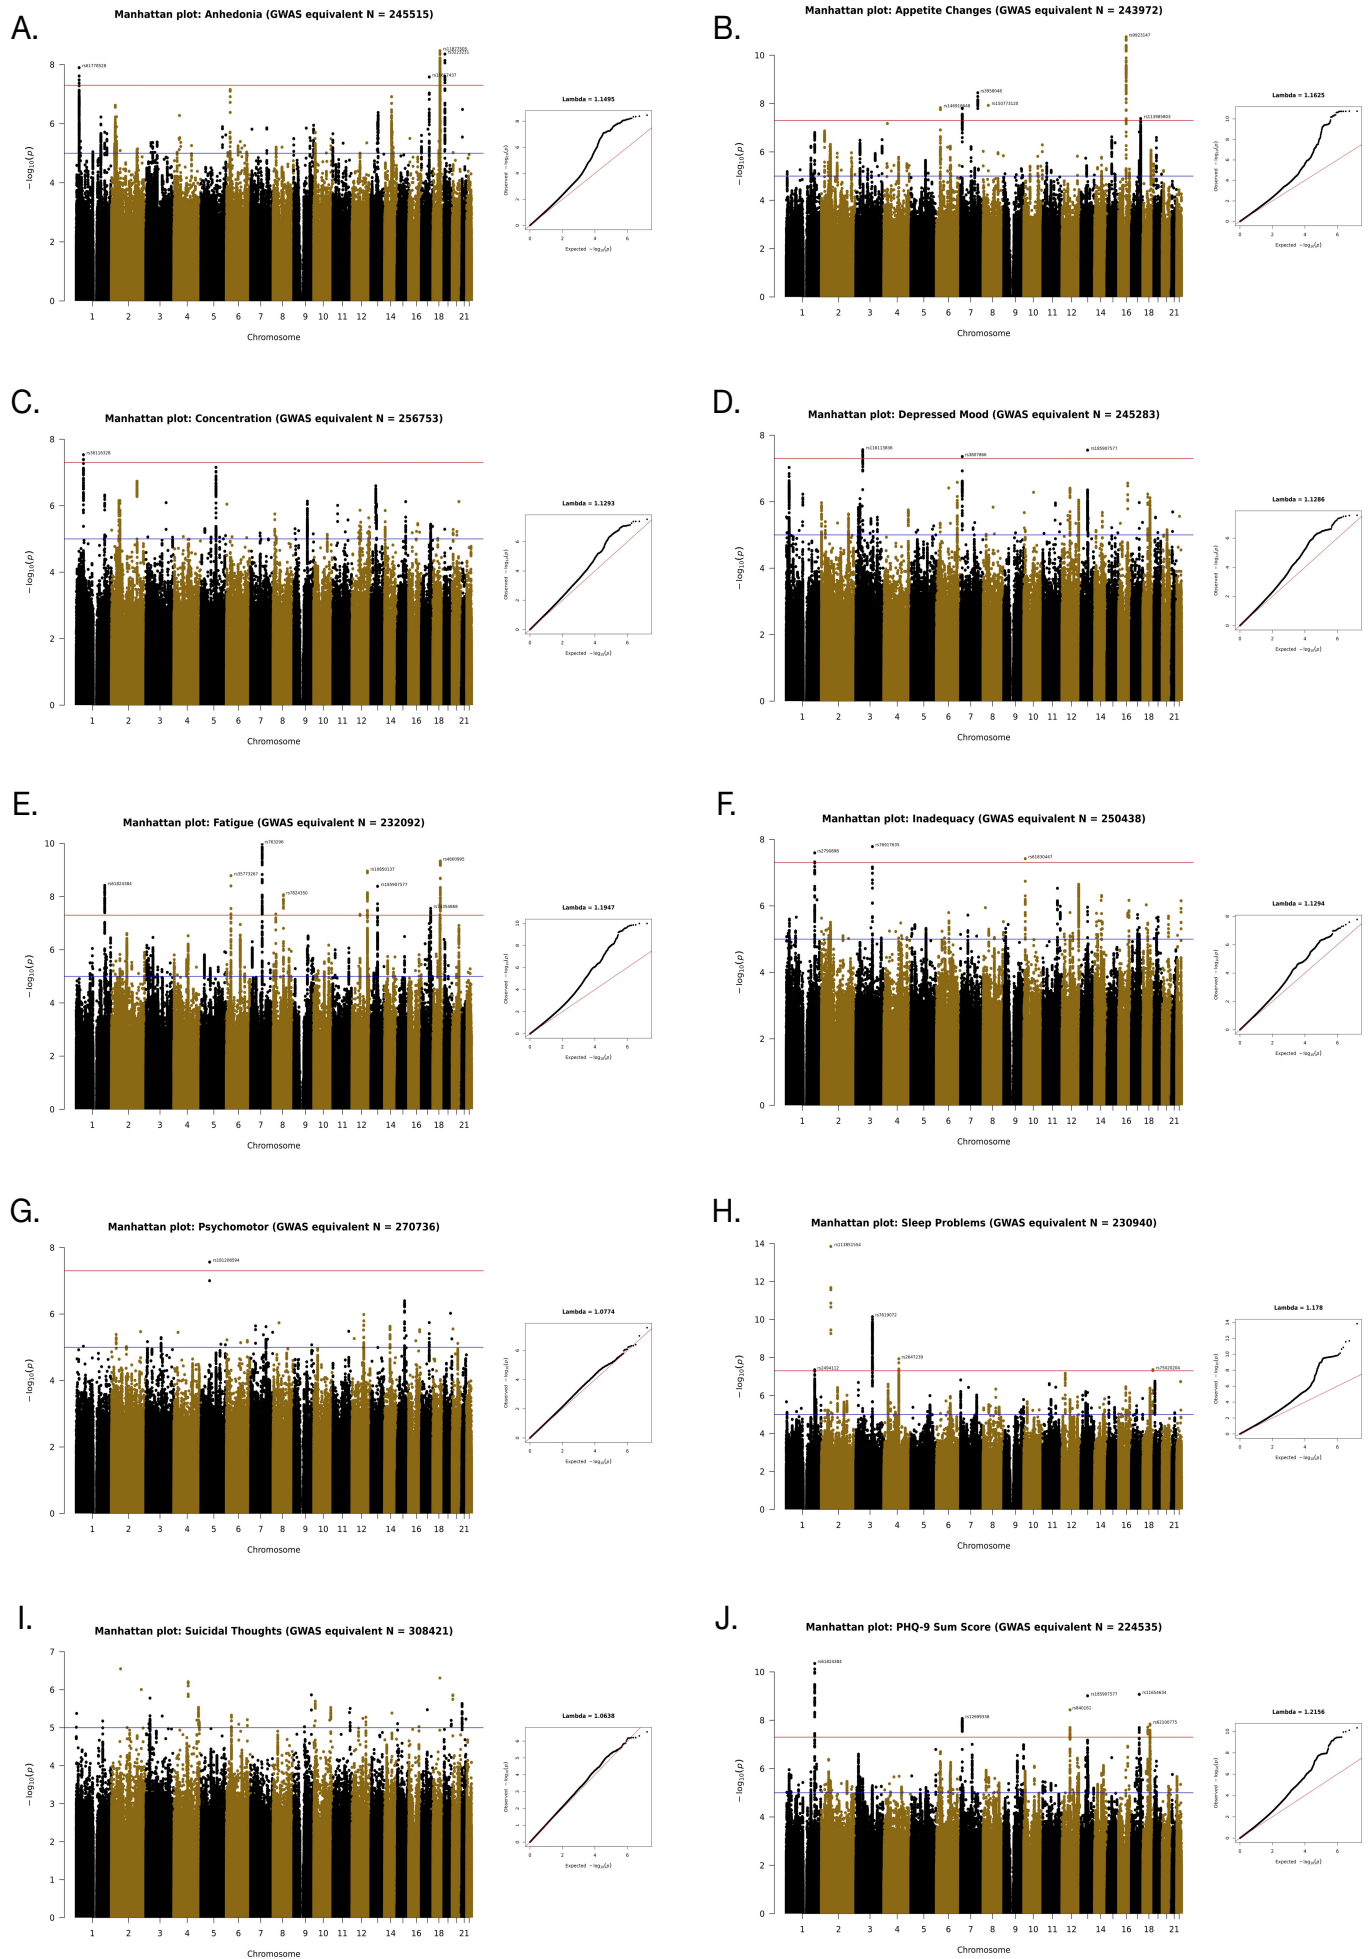



580 **Figure 2:** *Manhattan and QQ-plots for each of the 10 MTAG-PHQ-9 GWAS meta-analyses. The red*  
581 *lines on the Manhattan plots indicate genome-wide significance ( $p \leq 5 \times 10^{-8}$ ), while the blue lines*  
582 *indicates suggestive significance ( $p \leq 1e-5$ ). Top variants at each genomic risk loci are annotated.*

583

584

### 585 **3.2 Genetic correlations**

586 Of the 72 bivariate genetic correlations calculated between the 12 depression  
587 phenotypes and the six AD GWAS, 24 were nominally significant and 20 remained  
588 significant at  $p_{\text{FDR}} \leq 0.05$  ( $r_g$  range: -0.25 – 0.35;  $p$ -value range:  $1.25 \times 10^{-2}$  –  $4.01 \times 10^{-5}$ ;  
589  $p_{\text{FDR}}$  range:  $4.5 \times 10^{-2}$  –  $1.9 \times 10^{-3}$ ). Of these, 19 were identified when the AD GWAS  
590 in the pair contained either clinical+proxy cases and controls, or proxy-only cases  
591 and controls (**Figure 3; Supplementary Table 8**). Only one  $p_{\text{FDR}}$  significant association  
592 was found when using a clinical AD GWAS – between suicidal thoughts and  
593 Wightman et al. ( $r_g = -0.25$ ,  $p = 6.78 \times 10^{-3}$ ,  $p$ -value =  $6.78 \times 10^{-3}$ ;  $p_{\text{FDR}} = 3.48 \times 10^{-2}$ ).  
594 All depression phenotypes were significantly genetically correlated with each other  
595 ( $r_g$  range: 0.57– 0.98;  $p$ -values  $\leq 3.71 \times 10^{-23}$ ) (**Supplementary Table 9**). Only one  
596 PHQ-9 symptom pair – concentration problems and psychomotor changes – showed  
597 a genetic correlation that was not statistically different from one (95% CI included  
598 one), indicating genetic heterogeneity across depression symptoms.

599

600

601

602

603

604

605

606

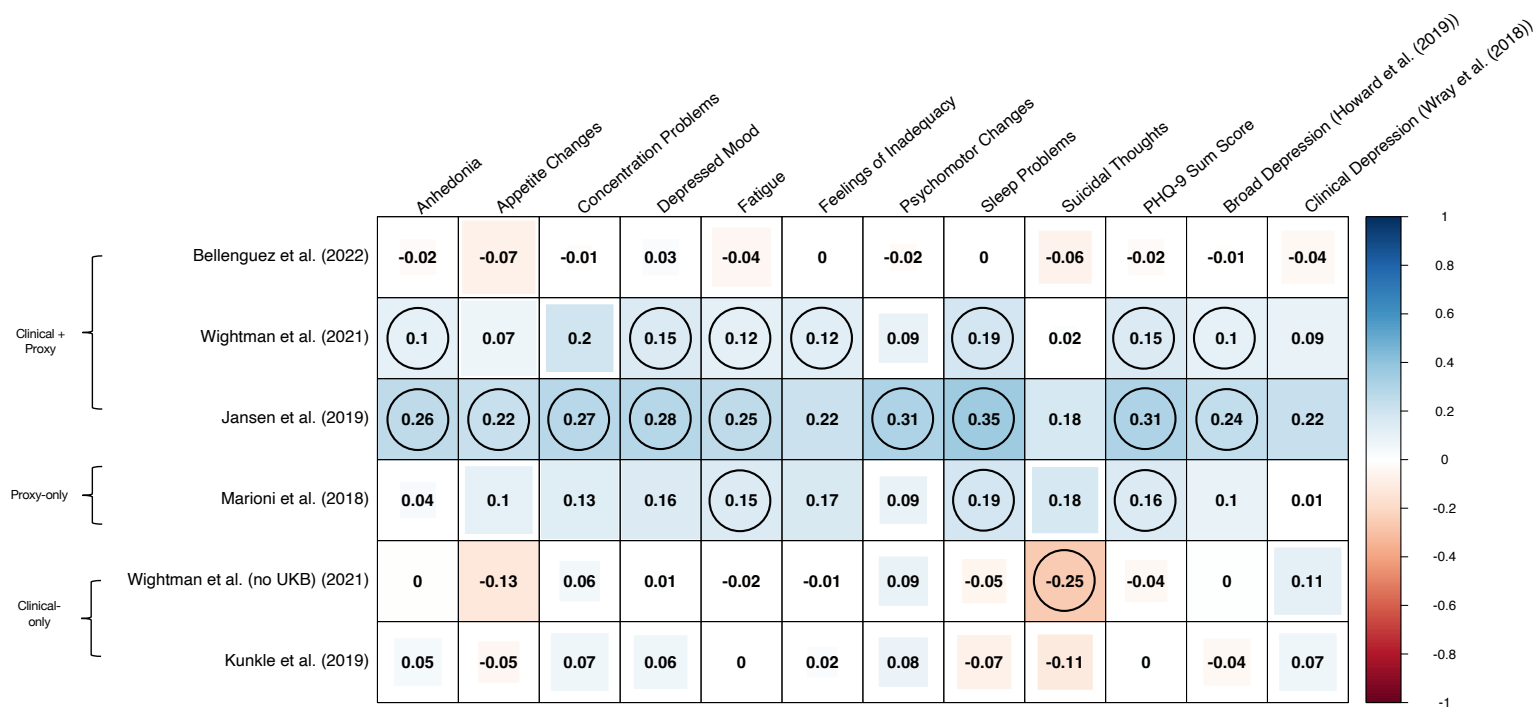

607

608 **Figure 3:** Heatmap of High Definition Likelihood (HDL) calculated genetic correlations between  
 609 depression items and the six Alzheimer's disease genome-wide association studies of varying  
 610 proxy/clinical case/control ascertainment. The colour of each square indicates the strength of the  
 611 correlation on a scale of -1 to 1. Fill size of the square indicates uncorrected p-value significance.  
 612 Genetic correlations significant at  $p_{FDR} \leq 0.05$  are circled.

613

614

### 615 3.3 Local genetic correlations

616 After univariate testing, a total of 4271 bivariate local genetic correlation tests were  
 617 conducted across 324 genomic loci. Of these tests, 716 were nominally significant  
 618 and 15 remained significant at  $p_{FDR} \leq 0.05$  across 14 unique genomic loci (local  $r_g$   
 619 range: -0.81 – 0.82;  $p$ -value range:  $1.48 \times 10^{-4}$  –  $4.2 \times 10^{-6}$ ;  $p_{FDR}$  range =  $4.22 \times 10^{-2}$  –  
 620  $1.38 \times 10^{-2}$ ) (**Supplementary Table 10**). Of the 15 statistically significant tests, ten were  
 621 identified when using clinical+proxy/proxy-only AD GWAS. No depression phenotype  
 622 showed a statistically significant association at the same genomic locus with more  
 623 than one AD GWAS. However, for ten of the 15 statistically significant tests, nominally  
 624 significant local genetic correlation was observed between the depression  
 625 phenotype and at least one additional AD GWAS at the same loci (**Supplementary**  
 626 **Table 11**). Only locus 1790 (chr12:51769420– 53039987) showed  $p_{FDR}$  significant  
 627 local genetic correlation with more than one depression phenotype – concentration  
 628 problems and sleep problems, both with the clinical-only Wightman et al. GWAS. The  
 629 number of positively and negatively correlated loci identified between each  
 630 phenotype pair can be viewed in **Supplementary Table 12**.

631

632

### 3.4 Colocalisation

633 Following LAVA, 14  $p_{\text{FDR}}$  significant regions of local genetic correlation were passed  
634 to the COLOC-reporter pipeline across 15 depression-AD phenotype pairs. A further  
635 14 colocalisation tests were conducted where nominally significant local genetic  
636 correlation was observed at a  $p_{\text{FDR}}$  significant loci between the same depression  
637 phenotype and a different AD GWAS. As such, a total of 29 statistical colocalisation  
638 tests were conducted to follow up LAVA results. No 95% credible sets were identified  
639 by SuSiE for any phenotype pairs in these regions. As such, all analyses were  
640 conducted under the single causal variant assumption of *coloc.abf*. There was no  
641 evidence of colocalisation in any of these loci (mean  $\text{PP.H}_4 = 0.59\%$ ) (**Supplementary**  
642 **Table 11**). All but two of these tests indicated no causal variant present in either  
643 phenotype ( $\text{PP.H}_0 > 0.8$ ). The two tests in locus 319 (chr2:126754028-127895644),  
644 indicated strong probability of a causal variant for the Kunkle et al.<sup>14</sup> and Wightman  
645 et al.<sup>45</sup> clinical AD GWAS ( $\text{PP.H}_2 > 0.9$ ). This locus contains *BIN1*, a known risk gene  
646 for AD involved in tau regulation<sup>100,101</sup>.

647 An additional 762 colocalisation tests were conducted with the six AD GWAS  
648 using regions +/-250kb ( $r^2 > 0.1$ ) lead variants from the MTAG-PHQ-9, broad and  
649 clinical depression GWAS. SuSiE identified evidence of colocalisation in regions +/-  
650 250kb of lead variants at genomic risk loci 14 (depressed mood), 15 (appetite  
651 change), 16 (PHQ-9 sum score) and for broad depression at chr7:12000402-  
652 12500402 ( $\text{PP.H}_4$  range: 0.79 – 0.85), all with the same three AD GWAS – Bellenguez  
653 et al.<sup>17</sup>, Wightman et al.<sup>16</sup>, and Wightman et al. (excluding the UKB)<sup>45</sup> (**Supplementary**  
654 **Table 13**). These colocalisations were all in the region of the transmembrane protein  
655 106B gene (*TMEM106B*) – visualised using LocusZoom<sup>102</sup> in **Figure 4**. Colocalisation  
656 was also identified for the same phenotype pairs at the same loci under the single  
657 causal variant assumption of *coloc.abf* (**Supplementary Table 14**). The same  
658 depression phenotypes and loci were suggestive of colocalisation with Jansen et al.<sup>15</sup>  
659 ( $\text{PP.H}_4 > 0.6$ ). In a follow-up analysis, we assessed statistical colocalisation +/-250kb  
660 *TMEM106B* (chr7:12000920-12532993) between these four AD GWAS and all  
661 remaining depression phenotypes. Additional evidence of colocalisation was  
662 identified at *TMEM106B* between fatigue and the Bellenguez et al.<sup>17</sup>, Wightman et  
663 al.<sup>16</sup>, and Wightman et al. (excluding the UKB)<sup>45</sup> AD GWAS (**Supplementary Table 15**),  
664 and was suggestive for Jansen et al.<sup>15</sup> (**Supplementary Table 16**). Evidence of  
665 colocalisation was also suggestive for psychomotor changes with Bellenguez et al.<sup>17</sup>,  
666 Wightman et al.<sup>16</sup>, and Wightman et al. (excluding the UKB)<sup>45</sup> ( $\text{PP.H}_4 > 0.6$ ).

667

668

669

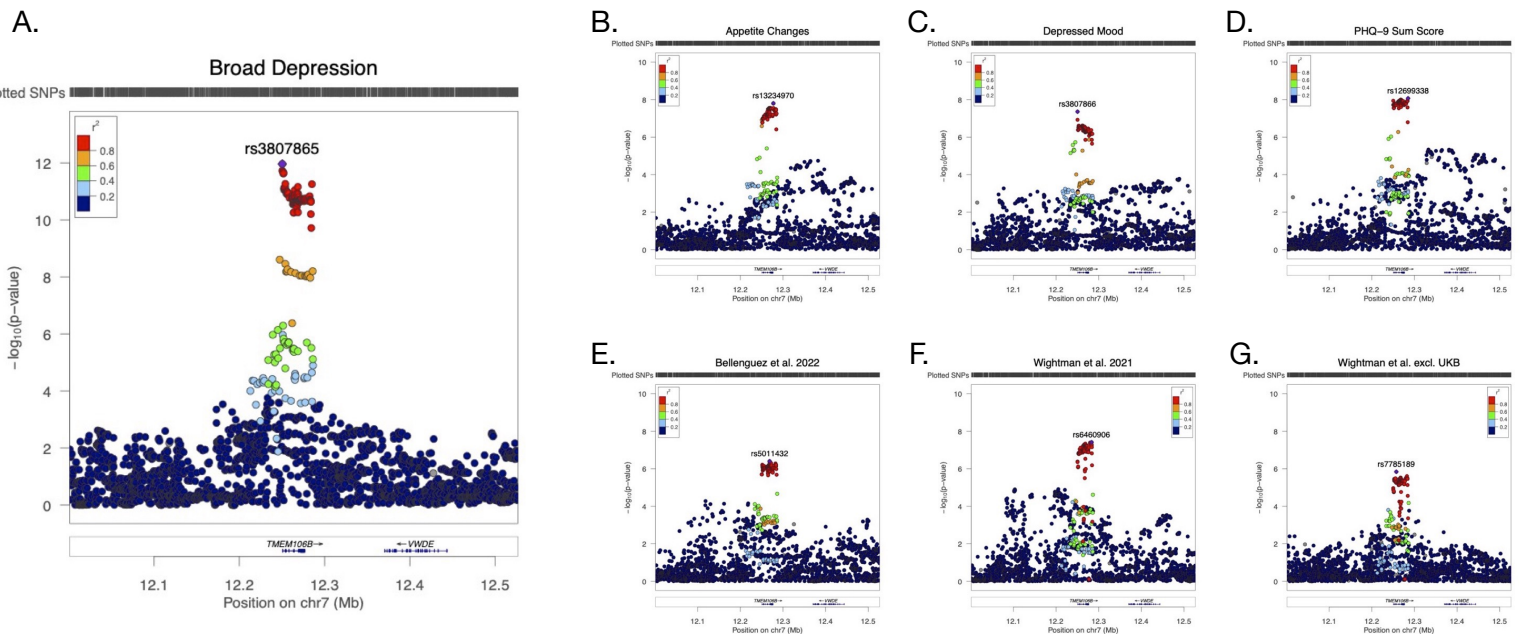

670 **Figure 4:** LocusZoom plots of the transmembrane protein 106B (*TMEM106B*) gene region containing  
 671 evidence of colocalisation ( $PP.H_4 \leq 0.8$ ) for (A.) broad depression, (B.) appetite changes, (C.)  
 672 depressed mood, (D.) the PHQ-9 sum score, (E.) Bellenguez et al., (F.) Wightman et al. and (G.)  
 673 Wightman et al. excluding the UK Biobank. The most significant variant for each phenotype is labelled  
 674 in their respective plot.

675

676

### 677 3.5 Mendelian Randomisation

678 We conducted 144 MR tests between the depression phenotypes and AD – 72 in  
 679 each direction. In CAUSE, no significant causal association was identified between  
 680 any of the depression items and AD in either direction even at nominal significance  
 681 (Supplementary Table 17).

682 F-statistics indicated that instrument strength was sufficient ( $F_{\text{Mean}}$  range: 22.43  
 683 – 63.36;  $F_{\text{Min}}$  range: 20.84 – 31.56;  $F_{\text{Max}}$  range: 26.37 – 402.86), as did  $I^2$  for instrument  
 684 suitability for MR-Egger ( $I^2$  range: 0.91 – 0.98). A  $p_{\text{FDR}} \leq 0.05$  was applied in each of  
 685 the other MR methods to correct for the 144 tests conducted, after which no  
 686 statistically significant associations were observed in any method. Three nominally  
 687 significant causal associations where a depression item was the exposure ( $\beta$  range  
 688 = 0.21 – 1.59;  $p$ -value range = 0.01 –  $2e-3$ ) and two where an AD GWAS was the  
 689 exposure ( $\beta$  range = 0.018 – 0.02;  $p$ -value range = 0.01 – 0.02) were detected by

690 IVW-MR, of which three were nominally significant in weighted-median MR. No  
691 significant pleiotropy (MR-Egger intercept test  $p$ -value  $\leq 0.05$ ) or heterogeneity (IVW  
692 Cochran's Q  $p$ -value  $\leq 0.05$ ) was detected for these five tests. However, nominally  
693 significant estimates were only observed between exposures and outcomes where  
694 the AD GWAS contained proxy+clinical or proxy-only cases/controls and where the  
695 GWAS used for both exposure and outcome were either majority or entirely derived  
696 from the UK Biobank, suggesting sample overlap as a potential source of bias. MR-  
697 PRESSO detected and excluded significant outliers in 42 tests, returning outlier-  
698 corrected causal estimates. Results remained non-significant. Full MR results can be  
699 viewed in **Supplementary Table 18**.

### 700 **3.6 Polygenic risk scores (PRS)**

701 No statistically significant associations were detected between any of the depression  
702 phenotype PRS and AD case/control status in any of the three AD target samples  
703 ( $p_{\text{FDR}} \leq 0.05$ , corrected within each sample), with only the suicidal thoughts PRS  
704 negatively nominally associated with AD case/control in the ADNI cohort  
705 (Nagelkerke's pseudo- $r^2 = 0.01$ , OR [95% CI] = 0.83 [0.72–0.94],  $\beta = -0.19$ , SE =  
706 0.07,  $p$ -value =  $7.90 \times 10^{-3}$ ). Exclusion of the APOE region had no effect on results  
707 (**Supplementary Table 19**).

708

## 709 **4. Discussion**

710 In this study, we performed the first and largest genome-wide meta-analysis of PHQ-  
711 9 depression symptom items to date (GWAS equivalent  $N$  range: 224,535 – 308,421),  
712 identifying 37 genomic risk loci. Follow-up analyses examining the genetic overlap  
713 between depression/depression symptoms and AD identified 20 significant global  
714 correlations and 15 significant local correlations at 14 loci across six AD GWAS with  
715 varying proportion of clinical case/control ascertainment. Significant global genetic  
716 correlations were primarily with AD GWAS containing proxy cases and controls. No  
717 colocalisation was identified at any of the regions of local genetic correlation.  
718 However, there was strong evidence of colocalisation between depression several  
719 phenotypes and AD in the region of *TMEM106B*. Overall, MR did not suggest that  
720 depression or its symptoms were causal for AD, nor vice versa, while polygenic risk  
721 scores for depression phenotypes were not predictive of AD case/control status in  
722 three clinical AD samples.

723 The increased power of our PHQ-9 GWAS allowed for the identification of 28  
724 more genomic risk loci than the previous analysis by Thorp et al.<sup>29</sup>. Several of the loci  
725 identified in this study have shown previous associations with related phenotypes.  
726 For example, *SHISA4* – here identified in association with fatigue symptoms – has  
727 been previously implicated as playing a role in disrupted sleep<sup>103</sup> and daytime



728 napping<sup>104</sup>. The top variant for sleep problems at genomic risk loci 6 (*MEIS1*) –  
729 rs113851554 (chr2: 66750564) – was also the top variant in a previous GWAS of  
730 insomnia and restless leg syndrome<sup>105</sup>. Additionally, the obesity gene *FTO*<sup>106</sup> was  
731 identified as a genomic risk loci for appetite changes. Although the role of *FTO* in  
732 depression is inconclusive<sup>107</sup>, it has been recently linked to anxiety and depression  
733 symptoms in individuals with anorexia nervosa (AN)<sup>108</sup>. Consequently, its  
734 identification in association with appetite change symptoms – a phenotype relevant  
735 to eating behaviours – suggests that symptom-based genetic analysis can help  
736 identify the phenotype-relevant biology of individual depression symptoms. Taken  
737 alongside the fact that only three of the genomic risk loci were shared between more  
738 than one depression symptom phenotype, our GWAS meta-analysis backs findings  
739 by Thorp et al.<sup>29</sup> of genetic heterogeneity between depression symptoms.

740 Our findings also highlight genetic similarities between depression symptoms.  
741 For example, *TMEM106B* – a gene identified in previous depression GWAS<sup>11,12</sup> – was  
742 the nearest gene to lead variants for three PHQ-9 items – appetite changes  
743 (rs13234970), depressed mood (rs3807866) and the PHQ-9 sum score  
744 (rs12699338). *TMEM106B* was strongly suggested as a causal gene in a recent multi-  
745 ancestry depression GWAS<sup>109</sup>. Further, dysregulation of *TMEM106B* expression has  
746 been implicated in association with MDD<sup>110</sup> and with anxious and weight gain MDD  
747 subtypes – both associated with treatment resistance<sup>111</sup>. *TMEM106B* has also been  
748 implicated in self-reported diagnosis of anxiety disorder<sup>112</sup>, neuroticism<sup>113</sup> and in a  
749 latent factor GWAS of depressive, manic and psychotic symptoms/disorders<sup>114</sup>,  
750 suggesting it is linked to psychiatric risk more generally.

751 That colocalisation is observed in the *TMEM106B* region between multiple  
752 depression phenotypes and both proxy+clinical and clinical-only AD is therefore of  
753 particular interest. *TMEM106B* plays a role in lysosomal function – particularly in  
754 motor neurons<sup>115</sup> – and is classically considered a risk gene for frontotemporal  
755 dementia<sup>116</sup>. It has also been identified in recent AD GWAS<sup>16,17</sup>, and is associated  
756 with brain aging, cognitive decline, and neurodegeneration across other brain  
757 disorders including Amyotrophic Lateral Sclerosis, Multiple Sclerosis and Parkinson's  
758 Disease<sup>117-122</sup>. Further, *TMEM106B* has been linked to higher CSF levels of  
759 neurofilament light (NfL)<sup>123</sup> – itself predictive of cognitive decline, brain atrophy and  
760 cortical amyloid burden in individuals with AD and Mild Cognitive Impairment  
761 (MCI)<sup>124</sup>. A recent study also identified higher levels of plasma NfL in individuals with  
762 depression, although the sample size of this study was relatively small<sup>125</sup>. Thus,  
763 colocalisation between depression phenotypes and AD at *TMEM106B* indicates that  
764 depression may itself be genetically linked to overall brain health and resulting  
765 general dementia risk. Two previous studies have identified *TMEM106B* as playing a  
766 role in both depression and AD<sup>20,21</sup>. However, our study suggests that this overlap



767 may be driven by the genetic architecture of specific depression symptoms,  
768 highlighting the benefits of symptom-level genetic analysis.

769 A mixed picture is painted across our other downstream analyses.  
770 Depression/depression symptom PRS were not predictive of AD case/control status  
771 in three clinical samples. Additionally, we do not find evidence of any causal  
772 associations using MR. These MR findings are in line with a number of previous  
773 studies<sup>19,39</sup>, but in contradiction to that conducted by Harerimana et al.<sup>22</sup>. In this study,  
774 we do not recapitulate the causal association identified by Harerimana et al.<sup>22</sup> for  
775 broad depression on AD as measured by Jansen et al.<sup>15</sup> – even at a nominal level.  
776 This is possibly due to the exclusion of rare variants (MAF < 0.01), and as such future  
777 investigation into the role of rare variants in shared risk for depression and AD is  
778 warranted. However, the lack of evidence in these analyses versus the observed  
779 relationship in epidemiological studies suggests the presence of unidentified  
780 confounding. The investigation of possible confounding is an important step for future  
781 research to help us better understand the association between depression and  
782 dementia.

783 While previous studies have shown that the direction of effect in MR can  
784 change depending on whether the outcome AD GWAS contains proxy or clinical  
785 cases/controls<sup>38,39</sup>, this study is – to the best of our knowledge – the first to  
786 demonstrate a similar effect with genetic correlations. Of the significant genetic  
787 correlations we identified, 95% were identified in proxy+clinical or proxy-only AD  
788 GWAS. Where two previous studies<sup>20,22</sup> identified a genetic correlation between  
789 depression and AD, it is noticeable that they used the Jansen et al. proxy+clinical AD  
790 GWAS as their primary outcome. Further, in the study by Harerimana et al.<sup>22</sup>  
791 sensitivity analysis did not observe a significant genetic correlation using the clinical-  
792 only GWAS by Kunkle et al.<sup>14</sup>.

793 Exactly why depression/depression symptoms show differences in genetic  
794 correlation between proxy and clinical AD is a matter of interest. It is noted that most  
795 individuals with dementia are cared for by a family member while they are still living  
796 in the community<sup>126</sup>. Caregivers incur considerable lifestyle changes, emotional  
797 stress, and social strain<sup>127,128</sup> and depression is reported in up to 50% of caregivers  
798 for individuals with dementia<sup>129</sup>. As such, the genetic correlations between  
799 depression/depression symptoms and proxy-AD may result from increased  
800 depression risk due to caregiver responsibilities, exacerbated by a genetic risk.  
801 However, this would not explain why no genetic correlations were identified with the  
802 Bellenguez et al.<sup>17</sup> GWAS despite this study also containing proxy+clinical  
803 phenotyping. As mentioned, Bellenguez et al.<sup>17</sup> define proxy cases/controls as a  
804 binary phenotype, whereas Wightman et al.<sup>16</sup> and Jansen et al.<sup>15</sup> define proxy  
805 cases/controls as a continuous phenotype. These phenotyping differences likely

806 partially explain the differences in the genetic correlation results, given that these AD  
807 GWAS all use the same data from the UK Biobank. However, the proxy-only Marioni  
808 et al.<sup>37</sup> GWAS – with which genetic correlations were also observed – is a meta-  
809 analysis of maternal and paternal AD GWAS where parental age-at-diagnosis/age-  
810 of-death is controlled for in the GWAS model, instead of being used for weighting the  
811 proxy phenotype prior analysis. Taking this into account, and considering that  
812 depression is itself associated with all-cause mortality<sup>130</sup>, it is possible that including  
813 age-at-diagnosis/age-of-death in proxy-AD phenotyping induces a form of bias in  
814 later cross-trait analyses when the other trait is itself associated with longevity. Further  
815 investigation of this issue is required.

816 Nonetheless, conflicting results such as these pose a problem to researchers  
817 seeking to identify genetic relationships between AD and its risk factors. Large  
818 differences in the presence or direction of effects depending on which AD GWAS is  
819 used to assess associations increases the difficulty in discerning true associations  
820 for the purpose of designing interventions. As such, we suggest that future genetic  
821 studies examining genetic overlap between AD risk factors and AD conduct primary  
822 analyses using a clinically ascertained AD phenotype. A range of AD GWAS with  
823 different proxy/clinical ascertainment could then be used to examine the consistency  
824 of results in relation to clinical AD. While this approach would limit researchers to AD  
825 GWAS with slightly smaller sample sizes for primary analyses, it would also ensure  
826 that results are driven not by AD proxy phenotyping alone.

827 This study has several limitations. Despite being the largest meta-analysis of  
828 PHQ-9 items to date, the ability to detect genome-wide significant variants was likely  
829 limited by small sample sizes relative to other psychiatric conditions. This includes  
830 depression itself, where sample sizes have exceeded one million<sup>13</sup>. Larger samples  
831 are required for future studies if we are to truly elucidate the unique genetic  
832 architecture of individual depression symptoms. Additionally, our analyses were  
833 restricted to individuals of European ancestry. GWAS results may therefore have poor  
834 transferability to other ancestry groups. Although efforts are underway to address the  
835 issue of lack of diversity in human genetic studies, urgency is required so that studies  
836 can be conducted across ancestry groups using equivalent sample sizes. Our study  
837 makes also heavy use of data from the UKB. The UKB is known to be affected by  
838 healthy volunteer bias, and as a consequence is not fully representative of the wider  
839 population<sup>131</sup>.

840 It is worth noting that this study focused on depression as a risk factor for AD.  
841 However, there is evidence that some forms of later life depression are in fact a  
842 prodromal phase of dementia onset<sup>8,132</sup>, and may be related to levels of dementia  
843 biomarkers such as plasma A $\beta$ 42 and CSF p-tau<sup>133</sup>. As such, dementia-related  
844 depression may be biologically distinct from depression as a mental health disorder.

845 While sufficient sample sizes are likely difficult to obtain, future large scale genomic  
846 studies of dementia-related depression – as has been undertaken with psychosis in  
847 AD<sup>134</sup> – would prove illuminating on this matter.

848 In conclusion, this study describes the largest genome-wide meta-analysis of  
849 PHQ-9 depression symptom items to date (GWAS equivalent  $N$  range: 224,535 –  
850 308,421), identifying 37 unique genomic risk loci. Genetic correlations between  
851 depression/depression symptoms and AD were primarily observed when the AD  
852 GWAS contained clinical+proxy or proxy-only AD case/control ascertainment.  
853 Further, this study does not support depression or its symptoms as being causal for  
854 AD. However, colocalisation in the *TMEM106B* region between four depression  
855 phenotypes and AD across both proxy and clinical AD GWAS suggests future  
856 research into the shared biological mechanisms underlying the role of this locus in  
857 depression and AD are warranted.

858

859

## 860 5. Funding and Acknowledgements

861

862 LG is funded by the King's College London DRIVE-Health Centre for Doctoral Training  
863 and the Perron Institute for Neurological and Translational. PP is funded by  
864 Alzheimer's Research UK. SK is funded by MSWA and the Perron Institute. HLD  
865 acknowledges funding from the Economic and Social Research Council (ESRC).  
866 DMH is supported by a Sir Henry Wellcome Postdoctoral Fellowship (Reference  
867 213674/Z/18/Z).

868

869 This paper represents independent research part-funded by the NIHR Maudsley  
870 Biomedical Research Centre at South London and Maudsley NHS Foundation Trust  
871 and King's College London. The views expressed are those of the author(s) and not  
872 necessarily those of the NIHR or the Department of Health and Social Care.

873

874 This research has been conducted using the UK Biobank Resource under  
875 Application Number 18177. We thank the UK Biobank Team for collecting the data  
876 and making it available. We also thank the UK Biobank participants.

877

878 We thank the GLAD Study volunteers for their participation, and gratefully  
879 acknowledge the NIHR BioResource centres, NHS Trusts and staff for their  
880 contribution. We thank the National Institute for Health Research, NHS Blood and  
881 Transplant, and Health Data Research UK as part of the Digital Innovation Hub  
882 Programme. This study presents independent research funded by the NIHR  
883 Biomedical Research Centre at South London and Maudsley NHS Foundation Trust  
884 and King's College London. Further information can be found at

885 <http://brc.slam.nhs.uk/about/core-facilities/bioresource>. The views expressed are  
886 those of the authors and not necessarily those of the NHS, the NIHR, the HSC R&D  
887 Division, King's College London, or the Department of Health and Social Care.

888  
889 The PROTECT study was funded/supported by the National Institute of Health and  
890 Care Research Exeter Biomedical Research Centre. PROTECT genetic data was  
891 funded in part by the University of Exeter through the MRC Proximity to Discovery:  
892 Industry Engagement Fund (External Collaboration, Innovation and Entrepreneurism:  
893 Translational Medicine in Exeter 2 (EXCITEME2) ref. MC\_PC\_17189). Genotyping was  
894 performed at deCODE Genetics. The views expressed are those of the author(s) and  
895 not necessarily those of the NIHR or the Dept of Health and Social Care.

896  
897 As data used in this study was obtained from the ADNI database, the ADNI  
898 investigators contributed to the conception of the sample and acquisition of this data,  
899 although were not participants in other parts of this study, such as conceptualisation,  
900 data analysis or writing. A full acknowledgment list of ADNI investigators can be found  
901 at: [https://adni.loni.usc.edu/wp-](https://adni.loni.usc.edu/wp-content/uploads/how_to_apply/ADNI_Acknowledgement_List.pdf)  
902 [content/uploads/how\\_to\\_apply/ADNI\\_Acknowledgement\\_List.pdf](https://adni.loni.usc.edu/wp-content/uploads/how_to_apply/ADNI_Acknowledgement_List.pdf)

903  
904 Similarly, data was obtained from the GERAD1 Consortium and GERAD1  
905 investigators contributed to the conception of the cohort and acquisition of this data,  
906 but did not participate in the conceptualisation, analysis or writing of this study. A full  
907 list of GERAD1 collaborators can be found in **Supplementary Material 1**.

908  
909 We also thank and acknowledge the contribution and use of the CREATE high-  
910 performance computing cluster at King's College London (King's College London.  
911 (2022). King's Computational Research, Engineering and Technology Environment  
912 (CREATE). Retrieved May 23, 2023, from <https://doi.org/10.18742/rnvf-m076>).

913  
914 The analysis flowchart in **Figure 1**. was created and licenced with BioRender  
915 ([www.biorender.com](http://www.biorender.com))

## 916 917 **6. Conflicts of Interest**

918 CML is on the Scientific Advisory Board of Myriad Neuroscience and has received  
919 honoraria for consultancy from UCB.

## 920 921 **7. Data availability**

922 All GWAS summary statistics generated in the process of conducting this study will  
923 be deposited in the NHGRI-EBI Catalog of human genome-wide association studies

924 (GWAS Catalog) following peer-review and publication. This study was pre-registered  
925 on the Open Science Framework  
926 ([https://osf.io/94q35/?view\\_only=e77f72d4100d47eea7f3ef07dfa9c059](https://osf.io/94q35/?view_only=e77f72d4100d47eea7f3ef07dfa9c059)).

927

928 This study made use of publicly available analysis software:

929

930 MungeSumstats

931 (<https://neurogenomics.github.io/MungeSumstats/articles/MungeSumstats.html>)

932

933 REGENIE (<https://rgcgithub.github.io/regenie/>)

934

935 MTAG (<https://github.com/JonJala/mtag>)

936

937 METAL ([https://genome.sph.umich.edu/wiki/METAL\\_Documentation](https://genome.sph.umich.edu/wiki/METAL_Documentation))

938

939 FUMA GWAS (<https://fuma.ctglab.nl>)

940

941 LDSC (<https://github.com/bulik/ldsc>)

942

943 HDL (<https://github.com/zhenin/HDL>)

944

945 LAVA (<https://github.com/josefin-werme/LAVA>)

946

947 susieR (<https://stephenslab.github.io/susieR/index.html>)

948

949 coloc (<https://chr1swallace.github.io/coloc/>)

950

951 COLOC-reporter (<https://github.com/ThomasPSpargo/COLOC-reporter>)

952

953 CAUSE (<https://jean997.github.io/cause/index.html>)

954

955 TwoSampleMR (<https://mrcieu.github.io/TwoSampleMR/>)

956

957 MegaPRS (<https://dougspeed.com/megaprs/>)

958

959                   References

- 960
- 961   1. Byers, A.L., and Yaffe, K. (2011). Depression and risk of developing dementia. *Nat. Rev.*  
962 *Neurol.* 7, 323–331.
- 963   2. Livingston, G., Huntley, J., Sommerlad, A., Ames, D., Ballard, C., Banerjee, S., Brayne,  
964 C., Burns, A., Cohen-Mansfield, J., Cooper, C., et al. (2020). Dementia prevention,  
965 intervention, and care: 2020 report of the Lancet Commission. *Lancet* 396, 413–446.
- 966   3. Yu, O.-C., Jung, B., Go, H., Park, M., and Ha, I.-H. (2020). Association between dementia  
967 and depression: a retrospective study using the Korean National Health Insurance Service-  
968 National Sample Cohort database. *BMJ Open* 10, e034924.
- 969   4. Yang, W., Li, X., Pan, K.-Y., Yang, R., Song, R., Qi, X., Pedersen, N.L., and Xu, W.  
970 (2021). Association of life-course depression with the risk of dementia in late life: A  
971 nationwide twin study. *Alzheimers Dement.* 17, 1383–1390.
- 972   5. Richmond-Rakerd, L.S., D’Souza, S., Milne, B.J., Caspi, A., and Moffitt, T.E. (2022).  
973 Longitudinal Associations of Mental Disorders With Dementia: 30-Year Analysis of 1.7  
974 Million New Zealand Citizens. *JAMA Psychiatry* 79, 333–340.
- 975   6. Yang, L., Deng, Y.-T., Leng, Y., Ou, Y.-N., Li, Y.-Z., Chen, S.-D., He, X.-Y., Wu, B.-S.,  
976 Huang, S.-Y., Zhang, Y.-R., et al. (2022). Depression, depression treatments, and risk of  
977 incident dementia: A prospective cohort study of 354,313 participants. *Biol. Psychiatry*.
- 978   7. GBD 2016 Dementia Collaborators (2019). Global, regional, and national burden of  
979 Alzheimer’s disease and other dementias, 1990-2016: a systematic analysis for the Global  
980 Burden of Disease Study 2016. *Lancet Neurol.* 18, 88–106.
- 981   8. Dafsari, F.S., and Jessen, F. (2020). Depression-an underrecognized target for prevention  
982 of dementia in Alzheimer’s disease. *Transl. Psychiatry* 10, 160.
- 983   9. Corfield, E.C., Yang, Y., Martin, N.G., and Nyholt, D.R. (2017). A continuum of genetic  
984 liability for minor and major depression. *Transl. Psychiatry* 7, e1131.
- 985   10. Gatz, M., Reynolds, C.A., Fratiglioni, L., Johansson, B., Mortimer, J.A., Berg, S., Fiske,  
986 A., and Pedersen, N.L. (2006). Role of genes and environments for explaining Alzheimer  
987 disease. *Arch. Gen. Psychiatry* 63, 168–174.
- 988   11. Wray, N.R., Ripke, S., Mattheisen, M., Trzaskowski, M., Byrne, E.M., Abdellaoui, A.,  
989 Adams, M.J., Agerbo, E., Air, T.M., Andlauer, T.M.F., et al. (2018). Genome-wide  
990 association analyses identify 44 risk variants and refine the genetic architecture of major  
991 depression. *Nat. Genet.* 50, 668–681.
- 992   12. Howard, D.M., Adams, M.J., Clarke, T.-K., Hafferty, J.D., Gibson, J., Shirali, M.,  
993 Coleman, J.R.I., Hagenaaars, S.P., Ward, J., Wigmore, E.M., et al. (2019). Genome-wide  
994 meta-analysis of depression identifies 102 independent variants and highlights the importance  
995 of the prefrontal brain regions. *Nat. Neurosci.* 22, 343–352.
- 996   13. Levey, D.F., Stein, M.B., Wendt, F.R., Pathak, G.A., Zhou, H., Aslan, M., Quaden, R.,  
997 Harrington, K.M., Nuñez, Y.Z., Overstreet, C., et al. (2021). Bi-ancestral depression GWAS  
998 in the Million Veteran Program and meta-analysis in >1.2 million individuals highlight new  
999 therapeutic directions. *Nat. Neurosci.* 24, 954–963.
- 1000   14. Kunkle, B.W., Grenier-Boley, B., Sims, R., Bis, J.C., Damotte, V., Naj, A.C., Boland, A.,  
1001 Vronskaya, M., van der Lee, S.J., Amlie-Wolf, A., et al. (2019). Genetic meta-analysis of  
1002 diagnosed Alzheimer’s disease identifies new risk loci and implicates A $\beta$ , tau, immunity and  
1003 lipid processing. *Nat. Genet.* 51, 414–430.
- 1004   15. Jansen, I.E., Savage, J.E., Watanabe, K., Bryois, J., Williams, D.M., Steinberg, S.,  
1005 Sealock, J., Karlsson, I.K., Hägg, S., Athanasiu, L., et al. (2019). Genome-wide meta-analysis  
1006 identifies new loci and functional pathways influencing Alzheimer’s disease risk. *Nat. Genet.*  
1007 51, 404–413.
- 1008   16. Wightman, D.P., Jansen, I.E., Savage, J.E., Shadrin, A.A., Bahrami, S., Holland, D.,



- 1009 Rongve, A., Børte, S., Winsvold, B.S., Drange, O.K., et al. (2021). A genome-wide  
1010 association study with 1,126,563 individuals identifies new risk loci for Alzheimer’s disease.  
1011 *Nat. Genet.* *53*, 1276–1282.
- 1012 17. Bellenguez, C., Küçükali, F., Jansen, I.E., Kleindan, L., Moreno-Grau, S., Amin, N.,  
1013 Naj, A.C., Campos-Martin, R., Grenier-Boley, B., Andrade, V., et al. (2022). New insights  
1014 into the genetic etiology of Alzheimer’s disease and related dementias. *Nat. Genet.* *54*, 412–  
1015 436.
- 1016 18. Gibson, J., Russ, T.C., Adams, M.J., Clarke, T.K., Howard, D.M., Hall, L.S., Fernandez-  
1017 Pujals, A.M., Wigmore, E.M., Hayward, C., Davies, G., et al. (2017). Assessing the presence  
1018 of shared genetic architecture between Alzheimer’s disease and major depressive disorder  
1019 using genome-wide association data. *Transl. Psychiatry* *7*, e1094.
- 1020 19. Andrews, S.J., Fulton-Howard, B., O’Reilly, P., Marcora, E., Goate, A.M., and  
1021 collaborators of the Alzheimer’s Disease Genetics Consortium (2021). Causal associations  
1022 between modifiable risk factors and the alzheimer’s phenome. *Ann. Neurol.* *89*, 54–65.
- 1023 20. Santos, F.C.D., Mendes-Silva, A.P., Nikolova, Y.C., Sibille, E., and Diniz, B.S. (2021).  
1024 Genetic overlap between major depression, bipolar disorder and Alzheimer’s Disease.  
1025 *MedRxiv*.
- 1026 21. Monereo-Sánchez, J., Schram, M.T., Frei, O., O’Connell, K., Shadrin, A.A., Smeland,  
1027 O.B., Westlye, L.T., Andreassen, O.A., Kaufmann, T., Linden, D.E.J., et al. (2021). Genetic  
1028 overlap between alzheimer’s disease and depression mapped onto the brain. *Front. Neurosci.*  
1029 *15*, 653130.
- 1030 22. Harerimana, N.V., Liu, Y., Gerasimov, E.S., Duong, D., Beach, T.G., Reiman, E.M.,  
1031 Schneider, J.A., Boyle, P., Lori, A., Bennett, D.A., et al. (2022). Genetic evidence supporting  
1032 a causal role of depression in alzheimer’s disease. *Biol. Psychiatry* *92*, 25–33.
- 1033 23. American Psychiatric Association (2013). Depressive Disorders. In *Diagnostic and*  
1034 *Statistical Manual of Mental Disorders*, (American Psychiatric Association), p.
- 1035 24. Fried, E.I., and Nesse, R.M. (2015). Depression is not a consistent syndrome: An  
1036 investigation of unique symptom patterns in the STAR\*D study. *J. Affect. Disord.* *172*, 96–  
1037 102.
- 1038 25. Zimmerman, M., Ellison, W., Young, D., Chelminski, I., and Dalrymple, K. (2015). How  
1039 many different ways do patients meet the diagnostic criteria for major depressive disorder?  
1040 *Compr. Psychiatry* *56*, 29–34.
- 1041 26. Park, S.-C., Kim, J.-M., Jun, T.-Y., Lee, M.-S., Kim, J.-B., Yim, H.-W., and Park, Y.C.  
1042 (2017). How many different symptom combinations fulfil the diagnostic criteria for major  
1043 depressive disorder? Results from the CRESCEND study. *Nord J Psychiatry* *71*, 217–222.
- 1044 27. Cai, N., Choi, K.W., and Fried, E.I. (2020). Reviewing the genetics of heterogeneity in  
1045 depression: operationalizations, manifestations and etiologies. *Hum. Mol. Genet.* *29*, R10–  
1046 R18.
- 1047 28. Nguyen, T.-D., Harder, A., Xiong, Y., Kowalec, K., Hägg, S., Cai, N., Kuja-Halkola, R.,  
1048 Dalman, C., Sullivan, P.F., and Lu, Y. (2022). Genetic heterogeneity and subtypes of major  
1049 depression. *Mol. Psychiatry* *27*, 1667–1675.
- 1050 29. Thorp, J.G., Marees, A.T., Ong, J.-S., An, J., MacGregor, S., and Derks, E.M. (2020).  
1051 Genetic heterogeneity in self-reported depressive symptoms identified through genetic  
1052 analyses of the PHQ-9. *Psychol. Med.* *50*, 2385–2396.
- 1053 30. So, Y., Kim, K.W., Park, J.H., Lee, J.J., Lee, S.B., and TaeHui Kim (2012). P3-396:  
1054 Anhedonia is associated with the risk of Alzheimer’s disease in elders with mild cognitive  
1055 impairment: Results from the Korean Longitudinal Study on Health and Aging (KLOSHA).  
1056 *Alzheimers Dement.* *8*, P594–P594.
- 1057 31. Lee, J.R., Suh, S.W., Han, J.W., Byun, S., Kwon, S.J., Lee, K.H., Kwak, K.P., Kim, B.J.,  
1058 Kim, S.G., Kim, J.L., et al. (2019). Anhedonia and Dysphoria Are Differentially Associated

- 1059 with the Risk of Dementia in the Cognitively Normal Elderly Individuals: A Prospective  
1060 Cohort Study. *Psychiatry Investig* 16, 575–580.
- 1061 32. Vaquero-Puyuelo, D., De-la-Cámara, C., Olaya, B., Gracia-García, P., Lobo, A., López-  
1062 Antón, R., and Santabárbara, J. (2021). Anhedonia as a Potential Risk Factor of Alzheimer’s  
1063 Disease in a Community-Dwelling Elderly Sample: Results from the ZARADEMP Project.  
1064 *Int. J. Environ. Res. Public Health* 18,.
- 1065 33. Ikeda, M., Brown, J., Holland, A.J., Fukuhara, R., and Hodges, J.R. (2002). Changes in  
1066 appetite, food preference, and eating habits in frontotemporal dementia and Alzheimer’s  
1067 disease. *J. Neurol. Neurosurg. Psychiatry* 73, 371–376.
- 1068 34. Bailon, O., Roussel, M., Boucart, M., Krystkowiak, P., and Godefroy, O. (2010).  
1069 Psychomotor slowing in mild cognitive impairment, Alzheimer’s disease and lewy body  
1070 dementia: mechanisms and diagnostic value. *Dement. Geriatr. Cogn. Disord.* 29, 388–396.
- 1071 35. Koren, T., Fisher, E., Webster, L., Livingston, G., and Rapaport, P. (2022). Prevalence of  
1072 sleep disturbances in people with dementia living in the community: A systematic review and  
1073 meta-analysis. *Ageing Res Rev* 101782.
- 1074 36. Escott-Price, V., and Hardy, J. (2022). Genome-wide association studies for Alzheimer’s  
1075 disease: bigger is not always better. *Brain Commun.* 4, faac125.
- 1076 37. Marioni, R.E., Harris, S.E., Zhang, Q., McRae, A.F., Hagenaars, S.P., Hill, W.D., Davies,  
1077 G., Ritchie, C.W., Gale, C.R., Starr, J.M., et al. (2018). GWAS on family history of  
1078 Alzheimer’s disease. *Transl. Psychiatry* 8, 99.
- 1079 38. Liu, H., Hu, Y., Zhang, Y., Zhang, H., Gao, S., Wang, L., Wang, T., Han, Z., Sun, B.-L.,  
1080 and Liu, G. (2022). Mendelian randomization highlights significant difference and genetic  
1081 heterogeneity in clinically diagnosed Alzheimer’s disease GWAS and self-report proxy  
1082 phenotype GWAS. *Alzheimers Res. Ther.* 14, 17.
- 1083 39. Desai, R., John, A., Saunders, R., Marchant, N.L., Buckman, J.E.J., Charlesworth, G.,  
1084 Zuber, V., and Stott, J. (2023). Examining the Lancet Commission risk factors for dementia  
1085 using Mendelian randomisation. *BMJ Ment Health* 26,.
- 1086 40. European Alzheimer’s & Dementia Biobank Mendelian Randomization (EADB-MR)  
1087 Collaboration, Luo, J., Thomassen, J.Q., Bellenguez, C., Grenier-Boley, B., de Rojas, I.,  
1088 Castillo, A., Parveen, K., Küçükali, F., Nicolas, A., et al. (2023). Genetic associations  
1089 between modifiable risk factors and alzheimer disease. *JAMA Netw. Open* 6, e2313734.
- 1090 41. Davies, M.R., Kalsi, G., Armour, C., Jones, I.R., McIntosh, A.M., Smith, D.J., Walters,  
1091 J.T.R., Bradley, J.R., Kingston, N., Ashford, S., et al. (2019). The Genetic Links to Anxiety  
1092 and Depression (GLAD) Study: Online recruitment into the largest recontactable study of  
1093 depression and anxiety. *Behav. Res. Ther.* 123, 103503.
- 1094 42. Creese, B., Arathimos, R., Brooker, H., Aarsland, D., Corbett, A., Lewis, C., Ballard, C.,  
1095 and Ismail, Z. (2021). Genetic risk for Alzheimer’s disease, cognition, and mild behavioral  
1096 impairment in healthy older adults. *Alzheimers Dement (Amst)* 13, e12164.
- 1097 43. Arathimos, R., Fabbri, C., Vassos, E., Davis, K.A.S., Pain, O., Gillett, A., Coleman,  
1098 J.R.I., Hanscombe, K., Hagenaars, S., Jermy, B., et al. (2022). Latent subtypes of manic  
1099 and/or irritable episode symptoms in two population-based cohorts. *Br. J. Psychiatry* 221,  
1100 722–731.
- 1101 44. Bycroft, C., Freeman, C., Petkova, D., Band, G., Elliott, L.T., Sharp, K., Motyer, A.,  
1102 Vukcevic, D., Delaneau, O., O’Connell, J., et al. (2018). The UK Biobank resource with deep  
1103 phenotyping and genomic data. *Nature* 562, 203–209.
- 1104 45. Wightman, D.P., Savage, J.E., Tissink, E., Romero, C., Jansen, I.E., and Posthuma, D.  
1105 (2023). The genetic overlap between Alzheimer’s disease, amyotrophic lateral sclerosis,  
1106 Lewy body dementia, and Parkinson’s disease. *Neurobiol. Aging*.
- 1107 46. Kroenke, K., Spitzer, R.L., and Williams, J.B. (2001). The PHQ-9: validity of a brief  
1108 depression severity measure. *J. Gen. Intern. Med.* 16, 606–613.

- 1109 47. Sun, Y., Fu, Z., Bo, Q., Mao, Z., Ma, X., and Wang, C. (2020). The reliability and  
1110 validity of PHQ-9 in patients with major depressive disorder in psychiatric hospital. *BMC*  
1111 *Psychiatry* 20, 474.
- 1112 48. Mbatchou, J., Barnard, L., Backman, J., Marcketta, A., Kosmicki, J.A., Ziyatdinov, A.,  
1113 Benner, C., O'Dushlaine, C., Barber, M., Boutkov, B., et al. (2021). Computationally  
1114 efficient whole-genome regression for quantitative and binary traits. *Nat. Genet.* 53, 1097–  
1115 1103.
- 1116 49. Chang, C.C., Chow, C.C., Tellier, L.C., Vattikuti, S., Purcell, S.M., and Lee, J.J. (2015).  
1117 Second-generation PLINK: rising to the challenge of larger and richer datasets. *Gigascience*  
1118 4, 7.
- 1119 50. Privé, F., Luu, K., Blum, M.G.B., McGrath, J.J., and Vilhjálmsson, B.J. (2020). Efficient  
1120 toolkit implementing best practices for principal component analysis of population genetic  
1121 data. *Bioinformatics* 36, 4449–4457.
- 1122 51. McCarthy, S., Das, S., Kretzschmar, W., Delaneau, O., Wood, A.R., Teumer, A., Kang,  
1123 H.M., Fuchsberger, C., Danecek, P., Sharp, K., et al. (2016). A reference panel of 64,976  
1124 haplotypes for genotype imputation. *Nat. Genet.* 48, 1279–1283.
- 1125 52. Chou, W.-C., Zheng, H.-F., Cheng, C.-H., Yan, H., Wang, L., Han, F., Richards, J.B.,  
1126 Karasik, D., Kiel, D.P., and Hsu, Y.-H. (2016). A combined reference panel from the  
1127 1000 Genomes and UK10K projects improved rare variant imputation in European and  
1128 Chinese samples. *Sci. Rep.* 6, 39313.
- 1129 53. Taliun, D., Harris, D.N., Kessler, M.D., Carlson, J., Szpiech, Z.A., Torres, R., Taliun,  
1130 S.A.G., Corvelo, A., Gogarten, S.M., Kang, H.M., et al. (2021). Sequencing of 53,831  
1131 diverse genomes from the NHLBI TOPMed Program. *Nature* 590, 290–299.
- 1132 54. 1000 Genomes Project Consortium, Auton, A., Brooks, L.D., Durbin, R.M., Garrison,  
1133 E.P., Kang, H.M., Korbel, J.O., Marchini, J.L., McCarthy, S., McVean, G.A., et al. (2015). A  
1134 global reference for human genetic variation. *Nature* 526, 68–74.
- 1135 55. Murphy, A.E., Schilder, B.M., and Skene, N.G. (2021). MungeSumstats: A Bioconductor  
1136 package for the standardisation and quality control of many GWAS summary statistics.  
1137 *Bioinformatics*.
- 1138 56. Bulik-Sullivan, B., Loh, P.-R., Finucane, H.K., Ripke, S., Yang, J., Schizophrenia  
1139 Working Group of the Psychiatric Genomics Consortium, Patterson, N., Daly, M.J., Price,  
1140 A.L., and Neale, B.M. (2015). LD Score regression distinguishes confounding from  
1141 polygenicity in genome-wide association studies. *Nat. Genet.* 47, 291–295.
- 1142 57. Bulik-Sullivan, B., Finucane, H.K., Anttila, V., Gusev, A., Day, F.R., Loh, P.-R.,  
1143 ReproGen Consortium, Psychiatric Genomics Consortium, Genetic Consortium for Anorexia  
1144 Nervosa of the Wellcome Trust Case Control Consortium 3, Duncan, L., et al. (2015). An  
1145 atlas of genetic correlations across human diseases and traits. *Nat. Genet.* 47, 1236–1241.
- 1146 58. Willer, C.J., Li, Y., and Abecasis, G.R. (2010). METAL: fast and efficient meta-analysis  
1147 of genomewide association scans. *Bioinformatics* 26, 2190–2191.
- 1148 59. Turley, P., Walters, R.K., Maghzian, O., Okbay, A., Lee, J.J., Fontana, M.A., Nguyen-  
1149 Viet, T.A., Wedow, R., Zacher, M., Furlotte, N.A., et al. (2018). Multi-trait analysis of  
1150 genome-wide association summary statistics using MTAG. *Nat. Genet.* 50, 229–237.
- 1151 60. Watanabe, K., Taskesen, E., van Bochoven, A., and Posthuma, D. (2017). Functional  
1152 mapping and annotation of genetic associations with FUMA. *Nat. Commun.* 8, 1826.
- 1153 61. Jaffe, A.E., Straub, R.E., Shin, J.H., Tao, R., Gao, Y., Collado-Torres, L., Kam-Thong,  
1154 T., Xi, H.S., Quan, J., Chen, Q., et al. (2018). Developmental and genetic regulation of the  
1155 human cortex transcriptome illuminate schizophrenia pathogenesis. *Nat. Neurosci.* 21, 1117–  
1156 1125.
- 1157 62. Wang, D., Liu, S., Warrell, J., Won, H., Shi, X., Navarro, F.C.P., Clarke, D., Gu, M.,  
1158 Emani, P., Yang, Y.T., et al. (2018). Comprehensive functional genomic resource and

- 1159 integrative model for the human brain. *Science* 362,  
1160 63. Fromer, M., Roussos, P., Sieberts, S.K., Johnson, J.S., Kavanagh, D.H., Perumal, T.M.,  
1161 Ruderfer, D.M., Oh, E.C., Topol, A., Shah, H.R., et al. (2016). Gene expression elucidates  
1162 functional impact of polygenic risk for schizophrenia. *Nat. Neurosci.* 19, 1442–1453.  
1163 64. Ramasamy, A., Trabzuni, D., Guelfi, S., Varghese, V., Smith, C., Walker, R., De, T., UK  
1164 Brain Expression Consortium, North American Brain Expression Consortium, Coin, L., et al.  
1165 (2014). Genetic variability in the regulation of gene expression in ten regions of the human  
1166 brain. *Nat. Neurosci.* 17, 1418–1428.  
1167 65. Westra, H.-J., Peters, M.J., Esko, T., Yaghootkar, H., Schurmann, C., Kettunen, J.,  
1168 Christiansen, M.W., Fairfax, B.P., Schramm, K., Powell, J.E., et al. (2013). Systematic  
1169 identification of trans eQTLs as putative drivers of known disease associations. *Nat. Genet.*  
1170 45, 1238–1243.  
1171 66. Zhernakova, D.V., Deelen, P., Vermaat, M., van Iterson, M., van Galen, M., Arindrarto,  
1172 W., van 't Hof, P., Mei, H., van Dijk, F., Westra, H.-J., et al. (2017). Identification of context-  
1173 dependent expression quantitative trait loci in whole blood. *Nat. Genet.* 49, 139–145.  
1174 67. Vösa, U., Claringbould, A., Westra, H.-J., Bonder, M.J., Deelen, P., Zeng, B., Kirsten, H.,  
1175 Saha, A., Kreuzhuber, R., Kasela, S., et al. (2018). Unraveling the polygenic architecture of  
1176 complex traits using blood eQTL meta-analysis. *BioRxiv*.  
1177 68. Buil, A., Brown, A.A., Lappalainen, T., Viñuela, A., Davies, M.N., Zheng, H.-F.,  
1178 Richards, J.B., Glass, D., Small, K.S., Durbin, R., et al. (2015). Gene-gene and gene-  
1179 environment interactions detected by transcriptome sequence analysis in twins. *Nat. Genet.*  
1180 47, 88–91.  
1181 69. Ng, B., White, C.C., Klein, H.-U., Sieberts, S.K., McCabe, C., Patrick, E., Xu, J., Yu, L.,  
1182 Gaiteri, C., Bennett, D.A., et al. (2017). An xQTL map integrates the genetic architecture of  
1183 the human brain's transcriptome and epigenome. *Nat. Neurosci.* 20, 1418–1426.  
1184 70. van Rheenen, W., Peyrot, W.J., Schork, A.J., Lee, S.H., and Wray, N.R. (2019). Genetic  
1185 correlations of polygenic disease traits: from theory to practice. *Nat. Rev. Genet.* 20, 567–  
1186 581.  
1187 71. Ning, Z., Pawitan, Y., and Shen, X. (2020). High-definition likelihood inference of  
1188 genetic correlations across human complex traits. *Nat. Genet.* 52, 859–864.  
1189 72. Werme, J., van der Sluis, S., Posthuma, D., and de Leeuw, C.A. (2022). An integrated  
1190 framework for local genetic correlation analysis. *Nat. Genet.* 54, 274–282.  
1191 73. Spargo, T.P., Gilchrist, L., Hunt, G.P., Dobson, R.J., Proitsi, P.P., Al-Chalabi, A., Pain,  
1192 O., and Iacoangeli, A. (2023). Statistical examination of shared loci in neuropsychiatric  
1193 diseases using genome-wide association study summary statistics. *MedRxiv*.  
1194 74. Zou, Y., Carbonetto, P., Wang, G., and Stephens, M. (2022). Fine-mapping from  
1195 summary data with the “Sum of Single Effects” model. *PLoS Genet.* 18, e1010299.  
1196 75. Wallace, C. (2021). A more accurate method for colocalisation analysis allowing for  
1197 multiple causal variants. *PLoS Genet.* 17, e1009440.  
1198 76. Giambartolomei, C., Vukcevic, D., Schadt, E.E., Franke, L., Hingorani, A.D., Wallace,  
1199 C., and Plagnol, V. (2014). Bayesian test for colocalisation between pairs of genetic  
1200 association studies using summary statistics. *PLoS Genet.* 10, e1004383.  
1201 77. Sanderson, E., Glymour, M.M., Holmes, M.V., Kang, H., Morrison, J., Munafò, M.R.,  
1202 Palmer, T., Schooling, C.M., Wallace, C., Zhao, Q., et al. (2022). Mendelian randomization.  
1203 *Nat. Rev. Methods Primers* 2, 6.  
1204 78. Burgess, S., Davies, N.M., and Thompson, S.G. (2016). Bias due to participant overlap in  
1205 two-sample Mendelian randomization. *Genet. Epidemiol.* 40, 597–608.  
1206 79. Morrison, J., Knoblauch, N., Marcus, J.H., Stephens, M., and He, X. (2020). Mendelian  
1207 randomization accounting for correlated and uncorrelated pleiotropic effects using genome-  
1208 wide summary statistics. *Nat. Genet.* 52, 740–747.



- 1209 80. Hemani, G., Bowden, J., and Davey Smith, G. (2018). Evaluating the potential role of  
1210 pleiotropy in Mendelian randomization studies. *Hum. Mol. Genet.* *27*, R195–R208.
- 1211 81. Slob, E.A.W., and Burgess, S. (2020). A comparison of robust Mendelian randomization  
1212 methods using summary data. *Genet. Epidemiol.* *44*, 313–329.
- 1213 82. Bowden, J., Davey Smith, G., and Burgess, S. (2015). Mendelian randomization with  
1214 invalid instruments: effect estimation and bias detection through Egger regression. *Int. J.*  
1215 *Epidemiol.* *44*, 512–525.
- 1216 83. Bowden, J., Davey Smith, G., Haycock, P.C., and Burgess, S. (2016). Consistent  
1217 Estimation in Mendelian Randomization with Some Invalid Instruments Using a Weighted  
1218 Median Estimator. *Genet. Epidemiol.* *40*, 304–314.
- 1219 84. Hartwig, F.P., Davey Smith, G., and Bowden, J. (2017). Robust inference in summary  
1220 data Mendelian randomization via the zero modal pleiotropy assumption. *Int. J. Epidemiol.*  
1221 *46*, 1985–1998.
- 1222 85. Verbanck, M., Chen, C.-Y., Neale, B., and Do, R. (2018). Detection of widespread  
1223 horizontal pleiotropy in causal relationships inferred from Mendelian randomization between  
1224 complex traits and diseases. *Nat. Genet.* *50*, 693–698.
- 1225 86. Burgess, S., and Thompson, S.G. (2017). Interpreting findings from Mendelian  
1226 randomization using the MR-Egger method. *Eur J Epidemiol* *32*, 377–389.
- 1227 87. Burgess, S., Bowden, J., Fall, T., Ingelsson, E., and Thompson, S.G. (2017). Sensitivity  
1228 Analyses for Robust Causal Inference from Mendelian Randomization Analyses with  
1229 Multiple Genetic Variants. *Epidemiology* *28*, 30–42.
- 1230 88. Lawlor, D.A., Harbord, R.M., Sterne, J.A.C., Timpson, N., and Davey Smith, G. (2008).  
1231 Mendelian randomization: using genes as instruments for making causal inferences in  
1232 epidemiology. *Stat. Med.* *27*, 1133–1163.
- 1233 89. Bowden, J., Del Greco M, F., Minelli, C., Davey Smith, G., Sheehan, N.A., and  
1234 Thompson, J.R. (2016). Assessing the suitability of summary data for two-sample Mendelian  
1235 randomization analyses using MR-Egger regression: the role of the I<sup>2</sup> statistic. *Int. J.*  
1236 *Epidemiol.* *45*, 1961–1974.
- 1237 90. Mahley, R.W. (2016). Apolipoprotein E: from cardiovascular disease to  
1238 neurodegenerative disorders. *J. Mol. Med.* *94*, 739–746.
- 1239 91. Liu, S., Liu, J., Weng, R., Gu, X., and Zhong, Z. (2019). Apolipoprotein E gene  
1240 polymorphism and the risk of cardiovascular disease and type 2 diabetes. *BMC Cardiovasc.*  
1241 *Disord.* *19*, 213.
- 1242 92. Xuan, L., Zhao, Z., Jia, X., Hou, Y., Wang, T., Li, M., Lu, J., Xu, Y., Chen, Y., Qi, L., et  
1243 al. (2018). Type 2 diabetes is causally associated with depression: a Mendelian randomization  
1244 analysis. *Front Med* *12*, 678–687.
- 1245 93. Lu, Y., Wang, Z., Georgakis, M.K., Lin, H., and Zheng, L. (2021). Genetic liability to  
1246 depression and risk of coronary artery disease, myocardial infarction, and other  
1247 cardiovascular outcomes. *J. Am. Heart Assoc.* *10*, e017986.
- 1248 94. Lord, J., Jermy, B., Green, R., Wong, A., Xu, J., Legido-Quigley, C., Dobson, R.,  
1249 Richards, M., and Proitsi, P. (2021). Mendelian randomization identifies blood metabolites  
1250 previously linked to midlife cognition as causal candidates in Alzheimer’s disease. *Proc.*  
1251 *Natl. Acad. Sci. USA* *118*,.
- 1252 95. Choi, S.W., Mak, T.S.-H., and O’Reilly, P.F. (2020). Tutorial: a guide to performing  
1253 polygenic risk score analyses. *Nat. Protoc.* *15*, 2759–2772.
- 1254 96. Zhang, Q., Privé, F., Vilhjálmsón, B., and Speed, D. (2021). Improved genetic prediction  
1255 of complex traits from individual-level data or summary statistics. *Nat. Commun.* *12*, 4192.
- 1256 97. Lovestone, S., Francis, P., Kloszewska, I., Mecocci, P., Simmons, A., Soininen, H.,  
1257 Spenger, C., Tsolaki, M., Vellas, B., Wahlund, L.-O., et al. (2009). AddNeuroMed--the  
1258 European collaboration for the discovery of novel biomarkers for Alzheimer’s disease. *Ann.*

- 1259 N. Y. Acad. Sci. *1180*, 36–46.
- 1260 98. Lord, J., Green, R., Choi, S.W., Hübel, C., Aarsland, D., Velayudhan, L., Sham, P.,  
1261 Legido-Quigley, C., Richards, M., Dobson, R., et al. (2022). Disentangling independent and  
1262 mediated causal relationships between blood metabolites, cognitive factors, and alzheimer’s  
1263 disease. *Biological Psychiatry Global Open Science* *2*, 167–179.
- 1264 99. Yang, J., Weedon, M.N., Purcell, S., Lettre, G., Estrada, K., Willer, C.J., Smith, A.V.,  
1265 Ingelsson, E., O’Connell, J.R., Mangino, M., et al. (2011). Genomic inflation factors under  
1266 polygenic inheritance. *Eur. J. Hum. Genet.* *19*, 807–812.
- 1267 100. Voskobiynyk, Y., Roth, J.R., Cochran, J.N., Rush, T., Carullo, N.V., Mesina, J.S.,  
1268 Waqas, M., Vollmer, R.M., Day, J.J., McMahon, L.L., et al. (2020). Alzheimer’s disease risk  
1269 gene BIN1 induces Tau-dependent network hyperexcitability. *Elife* *9*.
- 1270 101. Lambert, E., Saha, O., Soares Landeira, B., Melo de Farias, A.R., Hermant, X., Carrier,  
1271 A., Pelletier, A., Gadaut, J., Davoine, L., Dupont, C., et al. (2022). The Alzheimer  
1272 susceptibility gene BIN1 induces isoform-dependent neurotoxicity through early endosome  
1273 defects. *Acta Neuropathol. Commun.* *10*, 4.
- 1274 102. Pruim, R.J., Welch, R.P., Sanna, S., Teslovich, T.M., Chines, P.S., Gliedt, T.P.,  
1275 Boehnke, M., Abecasis, G.R., and Willer, C.J. (2010). LocusZoom: regional visualization of  
1276 genome-wide association scan results. *Bioinformatics* *26*, 2336–2337.
- 1277 103. Dashti, H.S., Daghlas, I., Lane, J.M., Huang, Y., Udler, M.S., Wang, H., Ollila, H.M.,  
1278 Jones, S.E., Kim, J., Wood, A.R., et al. (2021). Genetic determinants of daytime napping and  
1279 effects on cardiometabolic health. *Nat. Commun.* *12*, 900.
- 1280 104. Jansen, P.R., Watanabe, K., Stringer, S., Skene, N., Bryois, J., Hammerschlag, A.R., de  
1281 Leeuw, C.A., Benjamins, J.S., Muñoz-Manchado, A.B., Nagel, M., et al. (2019). Genome-  
1282 wide analysis of insomnia in 1,331,010 individuals identifies new risk loci and functional  
1283 pathways. *Nat. Genet.* *51*, 394–403.
- 1284 105. Hammerschlag, A.R., Stringer, S., de Leeuw, C.A., Sniekers, S., Taskesen, E.,  
1285 Watanabe, K., Blanken, T.F., Dekker, K., Te Lindert, B.H.W., Wassing, R., et al. (2017).  
1286 Genome-wide association analysis of insomnia complaints identifies risk genes and genetic  
1287 overlap with psychiatric and metabolic traits. *Nat. Genet.* *49*, 1584–1592.
- 1288 106. Loos, R.J.F., and Yeo, G.S.H. (2022). The genetics of obesity: from discovery to  
1289 biology. *Nat. Rev. Genet.* *23*, 120–133.
- 1290 107. Zarza-Rebollo, J.A., Molina, E., and Rivera, M. (2021). The role of the FTO gene in the  
1291 relationship between depression and obesity. A systematic review. *Neurosci. Biobehav. Rev.*  
1292 *127*, 630–637.
- 1293 108. González, L.M., García-Herráiz, A., Mota-Zamorano, S., Flores, I., Albuquerque, D.,  
1294 and Gervasini, G. (2021). Variants in the Obesity-Linked FTO gene locus modulates  
1295 psychopathological features of patients with Anorexia Nervosa. *Gene* *783*, 145572.
- 1296 109. Li, Y., Dang, X., Chen, R., Wang, J., Li, S., Mitchell, B.L., Yao, Y.-G., Li, M., Li, T.,  
1297 Zhang, Z., et al. (2023). Cross-ancestry genome-wide association study and systems-level  
1298 integrative analyses implicate new risk genes and therapeutic targets for depression.  
1299 MedRxiv.
- 1300 110. Dall’Aglia, L., Lewis, C.M., and Pain, O. (2021). Delineating the genetic component of  
1301 gene expression in major depression. *Biol. Psychiatry* *89*, 627–636.
- 1302 111. Fabbri, C., Pain, O., Hagenaaars, S.P., Lewis, C.M., and Serretti, A. (2021).  
1303 Transcriptome-wide association study of treatment-resistant depression and depression  
1304 subtypes for drug repurposing. *Neuropsychopharmacology* *46*, 1821–1829.
- 1305 112. Koskinen, M.-K., and Hovatta, I. (2023). Genetic insights into the neurobiology of  
1306 anxiety. *Trends Neurosci.* *46*, 318–331.
- 1307 113. Nagel, M., Jansen, P.R., Stringer, S., Watanabe, K., de Leeuw, C.A., Bryois, J., Savage,  
1308 J.E., Hammerschlag, A.R., Skene, N.G., Muñoz-Manchado, A.B., et al. (2018). Meta-analysis



- 1309 of genome-wide association studies for neuroticism in 449,484 individuals identifies novel  
1310 genetic loci and pathways. *Nat. Genet.* *50*, 920–927.
- 1311 114. Mallard, T.T., Linnér, R.K., Grotzinger, A.D., Sanchez-Roige, S., Seidlitz, J., Okbay,  
1312 A., de Vlaming, R., Meddens, S.F.W., Bipolar Disorder Working Group of the Psychiatric  
1313 Genomics Consortium, Palmer, A.A., et al. (2022). Multivariate GWAS of psychiatric  
1314 disorders and their cardinal symptoms reveal two dimensions of cross-cutting genetic  
1315 liabilities. *Cell Genomics* *2*,
- 1316 115. Lüningschrör, P., Werner, G., Stroobants, S., Kakuta, S., Dombert, B., Sinske, D.,  
1317 Wanner, R., Lüllmann-Rauch, R., Wefers, B., Wurst, W., et al. (2020). The FTL risk factor  
1318 TMEM106B regulates the transport of lysosomes at the axon initial segment of motoneurons.  
1319 *Cell Rep.* *30*, 3506–3519.e6.
- 1320 116. Van Deerlin, V.M., Sleiman, P.M.A., Martinez-Lage, M., Chen-Plotkin, A., Wang, L.-  
1321 S., Graff-Radford, N.R., Dickson, D.W., Rademakers, R., Boeve, B.F., Grossman, M., et al.  
1322 (2010). Common variants at 7p21 are associated with frontotemporal lobar degeneration with  
1323 TDP-43 inclusions. *Nat. Genet.* *42*, 234–239.
- 1324 117. Nicholson, A.M., and Rademakers, R. (2016). What we know about TMEM106B in  
1325 neurodegeneration. *Acta Neuropathol.* *132*, 639–651.
- 1326 118. Feng, T., Lacrampe, A., and Hu, F. (2021). Physiological and pathological functions of  
1327 TMEM106B: a gene associated with brain aging and multiple brain disorders. *Acta*  
1328 *Neuropathol.* *141*, 327–339.
- 1329 119. Perneel, J., and Rademakers, R. (2022). Identification of TMEM106B amyloid fibrils  
1330 provides an updated view of TMEM106B biology in health and disease. *Acta Neuropathol.*  
1331 *144*, 807–819.
- 1332 120. Mao, F., Robinson, J.L., Unger, T., Posavi, M., Amado, D.A., Elman, L., Grossman, M.,  
1333 Wolk, D.A., Lee, E.B., Van Deerlin, V.M., et al. (2021). TMEM106B modifies TDP-43  
1334 pathology in human ALS brain and cell-based models of TDP-43 proteinopathy. *Acta*  
1335 *Neuropathol.* *142*, 629–642.
- 1336 121. Vass, R., Ashbridge, E., Geser, F., Hu, W.T., Grossman, M., Clay-Falcone, D., Elman,  
1337 L., McCluskey, L., Lee, V.M.Y., Van Deerlin, V.M., et al. (2011). Risk genotypes at  
1338 TMEM106B are associated with cognitive impairment in amyotrophic lateral sclerosis. *Acta*  
1339 *Neuropathol.* *121*, 373–380.
- 1340 122. Shafit-Zagardo, B., Sidoli, S., Goldman, J.E., DuBois, J.C., Corboy, J.R., Strittmatter,  
1341 S.M., Guzik, H., Graff, S., and Nagra, R.M. (2022). TMEM106B is increased in Multiple  
1342 Sclerosis plaques, and deletion causes accumulation of lipid after demyelination. *BioRxiv*.
- 1343 123. Hong, S., Dobricic, V., Ohlei, O., Bos, I., Vos, S.J.B., Prokopenko, D., Tijms, B.M.,  
1344 Andreasson, U., Blennow, K., Vandenberghe, R., et al. (2021). TMEM106B and CPOX are  
1345 genetic determinants of cerebrospinal fluid Alzheimer’s disease biomarker levels. *Alzheimers*  
1346 *Dement.* *17*, 1628–1640.
- 1347 124. Dhiman, K., Gupta, V.B., Villemagne, V.L., Eratne, D., Graham, P.L., Fowler, C.,  
1348 Bourgeat, P., Li, Q.-X., Collins, S., Bush, A.I., et al. (2020). Cerebrospinal fluid  
1349 neurofilament light concentration predicts brain atrophy and cognition in Alzheimer’s  
1350 disease. *Alzheimers Dement (Amst)* *12*, e12005.
- 1351 125. Chen, M.-H., Liu, Y.-L., Kuo, H.-W., Tsai, S.-J., Hsu, J.-W., Huang, K.-L., Tu, P.-C.,  
1352 and Bai, Y.-M. (2022). Neurofilament light chain is a novel biomarker for major depression  
1353 and related executive dysfunction. *Int. J. Neuropsychopharmacol.* *25*, 99–105.
- 1354 126. Brodaty, H., and Donkin, M. (2009). Family caregivers of people with dementia.  
1355 *Dialogues Clin Neurosci* *11*, 217–228.
- 1356 127. Lindeza, P., Rodrigues, M., Costa, J., Guerreiro, M., and Rosa, M.M. (2020). Impact of  
1357 dementia on informal care: a systematic review of family caregivers’ perceptions. *BMJ*  
1358 *Support. Palliat. Care.*

- 1359 128. Victor, C.R., Rippon, I., Quinn, C., Nelis, S.M., Martyr, A., Hart, N., Lamont, R., and  
1360 Clare, L. (2021). The prevalence and predictors of loneliness in caregivers of people with  
1361 dementia: findings from the IDEAL programme. *Aging Ment. Health* 25, 1232–1238.
- 1362 129. Huang, S.-S. (2022). Depression among caregivers of patients with dementia:  
1363 Associative factors and management approaches. *World J. Psychiatry* 12, 59–76.
- 1364 130. Chesney, E., Goodwin, G.M., and Fazel, S. (2014). Risks of all-cause and suicide  
1365 mortality in mental disorders: a meta-review. *World Psychiatry* 13, 153–160.
- 1366 131. Fry, A., Littlejohns, T.J., Sudlow, C., Doherty, N., Adamska, L., Sprosen, T., Collins,  
1367 R., and Allen, N.E. (2017). Comparison of Sociodemographic and Health-Related  
1368 Characteristics of UK Biobank Participants With Those of the General Population. *Am. J.*  
1369 *Epidemiol.* 186, 1026–1034.
- 1370 132. Brommelhoff, J.A., Gatz, M., Johansson, B., McArdle, J.J., Fratiglioni, L., and  
1371 Pedersen, N.L. (2009). Depression as a risk factor or prodromal feature for dementia?  
1372 Findings in a population-based sample of Swedish twins. *Psychol. Aging* 24, 373–384.
- 1373 133. Creese, B., and Ismail, Z. (2022). Mild behavioral impairment: measurement and  
1374 clinical correlates of a novel marker of preclinical Alzheimer’s disease. *Alzheimers Res.*  
1375 *Ther.* 14, 2.
- 1376 134. DeMichele-Sweet, M.A.A., Klei, L., Creese, B., Harwood, J.C., Weamer, E.A.,  
1377 McClain, L., Sims, R., Hernandez, I., Moreno-Grau, S., Tárraga, L., et al. (2021). Genome-  
1378 wide association identifies the first risk loci for psychosis in Alzheimer disease. *Mol.*  
1379 *Psychiatry* 26, 5797–5811.
- 1380  
1381  
1382  
1383  
1384  
1385
